# Supplementary material for: QUIRMIA—A Phenotype-Based Algorithm for the Inference of Quinolone Resistance Mechanisms in Escherichia coli
Source: MDPI journal article supplement (doi:10.3390/antibiotics12071119), 2023-06-28
Supplement: s1 [file s1]

## Supplementary Materials

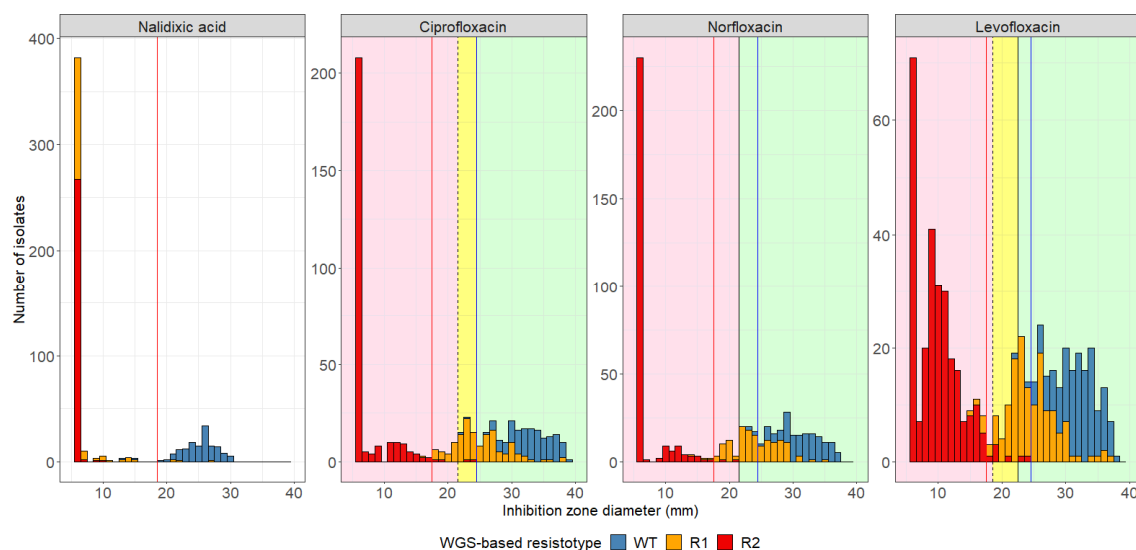

**Figure S1. Distribution of the inhibition diameters with WGS-based clinical categorization.** EUCAST lower and upper clinical breakpoints are indicated by the dashed and continuous black lines, respectively. EUCAST ECOFFs and IMM working cut-off separators are indicated by the blue and red continuous lines, respectively. The coloured areas reflect the EUCAST clinical categories of susceptible (green), susceptible by increased exposure (yellow) and resistant (red). WT, wild-type; R1, Low-level resistance; R2, High-level-resistance.

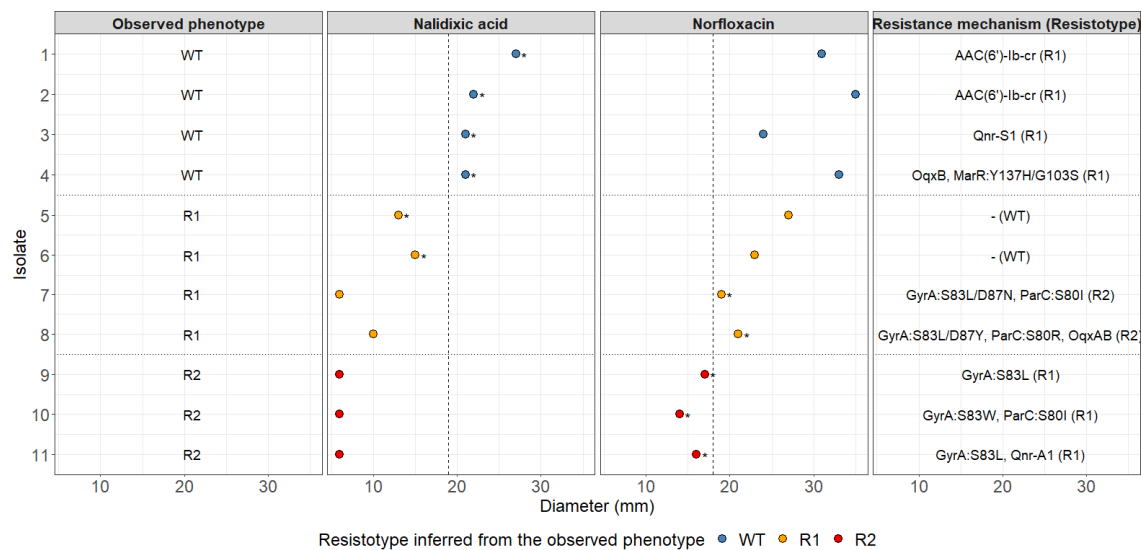

**Figure S2. Inhibition zone diameters of isolates with discordant phenotype/genotype.** Dots indicate the inhibition zone diameters of isolates with discrepant QUIRMIA-derived resistance mechanism(s) and WGS-based genotype(s). Asterisks indicate the inhibition diameter responsible for the discrepancy, respectively. Vertical dashed lines indicate IMM working cut-off separators. WT, wildtype; R1, low-level resistance, R2, high-level resistance.

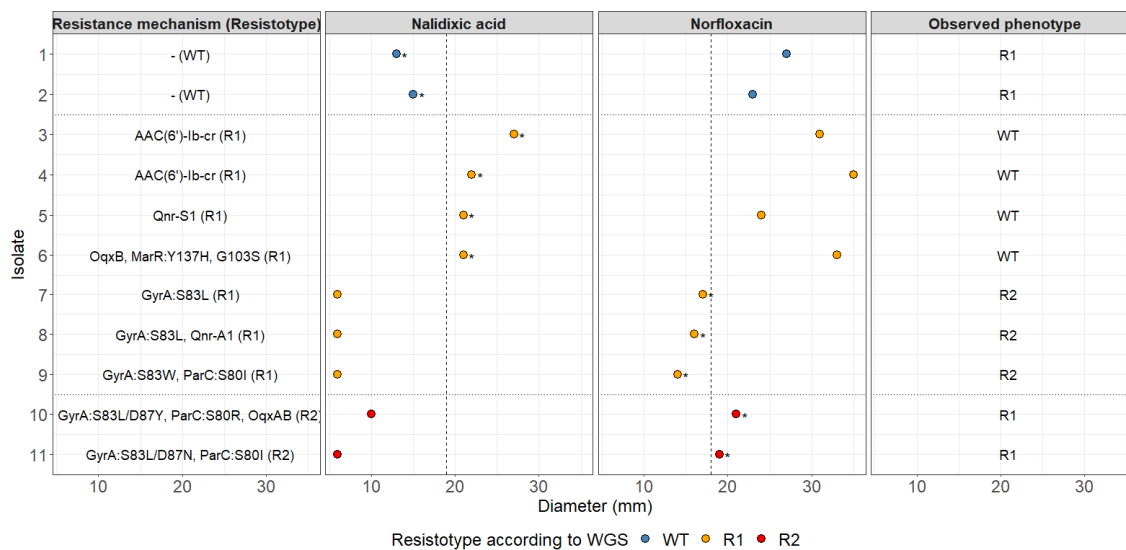

**Figure S3. Inhibition zone diameters of isolates with discordant genotype/phenotype.** Dots indicate the inhibition diameters of isolates with discrepancies regarding WGS-based predicted vs. observed phenotypes. Asterisks indicate the inhibition diameters responsible for the discrepancy, respectively. Vertical dashed lines indicate the IMM working cut-off separators. WT, wildtype; R1, low-level resistance, R2, high-level resistance.

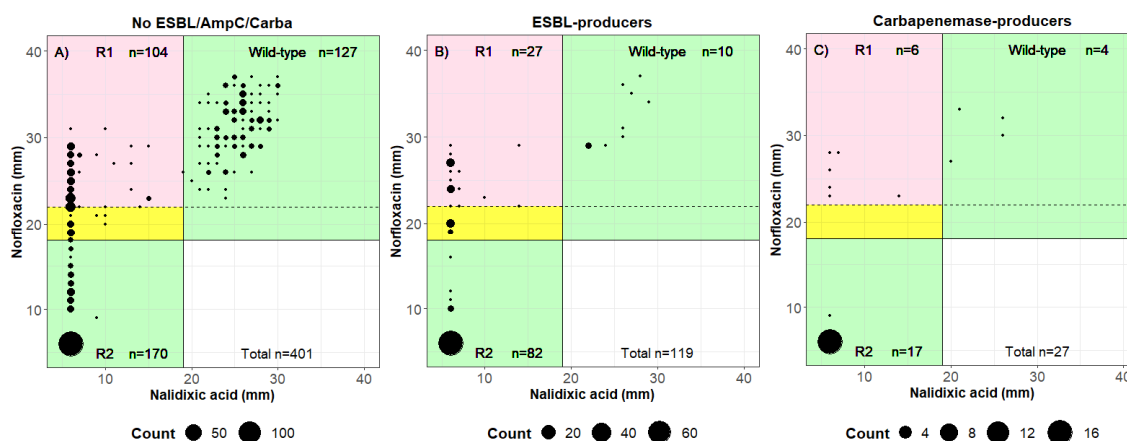

**Figure S4. Inhibition zone diameter distributions of isolates grouped by  $\beta$ -lactamase production.**

Dots correspond to inhibition zone diameters for nalidixic acid and norfloxacin of A) isolates producing no ESBL or carbapenemases, B) ESBL-producers and C) carbapenemase-producers. Vertical and horizontal continuous lines indicate the IMM working cut-off separators for norfloxacin and nalidixic acid, respectively. Horizontal dashed lines indicate the EUCAST ECOFFs for norfloxacin. Green backgrounds reflect concordance between EUCAST- and WGS-based classification. Red and yellow backgrounds reflect isolates classified as low-level resistant based on WGS data and as susceptible or resistant according to EUCAST guidelines, respectively. R1, low-level resistance, R2, high-level resistance.

**Table S1. List of fluoroquinolone resistance mechanisms in *Escherichia coli*.**

| Resistance mechanism(s)                               | Mechanism of action          | Location of the gene(s) | Resistance phenotype  |
|-------------------------------------------------------|------------------------------|-------------------------|-----------------------|
| <i>qnr</i> [1-3]                                      | Target protection            | Plasmidic               | Low-level resistance  |
| AAC(6)-Ib-cr [4]                                      | Drug inactivation            | Plasmidic               | Low-level resistance  |
| <i>marR</i> mutations [5,6]                           | Drug efflux/decreased uptake | Chromosomal             | Low-level resistance  |
| <i>acrR</i> mutation [5,7]                            | Drug efflux                  | Chromosomal             | Low-level resistance  |
| <i>soxS</i> mutation [8]                              | Drug efflux                  | Chromosomal             | Low-level resistance  |
| <i>oqxAB</i> [9]                                      | Drug efflux                  | Plasmidic               | Low-level resistance  |
| <i>qep</i> [10]                                       | Drug efflux                  | Plasmidic               | Low-level resistance  |
| 1 <i>gyrA</i> mutation [11]                           | Target modification          | Chromosomal             | Low-level resistance  |
| 1 <i>gyrA</i> mutation + 1 <i>parC</i> mutation [11]  | Target modification          | Chromosomal             | Low-level resistance  |
| 2 <i>gyrA</i> mutations [11]                          | Target modification          | Chromosomal             | Low-level resistance  |
| 1 <i>gyrB</i> mutation [12]                           | Target modification          | Chromosomal             | Low-level resistance  |
| 2 <i>gyrA</i> mutations + 1 <i>parC</i> mutation [11] | Target modification          | Chromosomal             | High-level resistance |

## References

1. Briales A, Rodriguez-Martinez JM, Velasco C et al. In vitro effect of *qnrA1*, *qnrB1*, and *qnrS1* genes on fluoroquinolone activity against isogenic *Escherichia coli* isolates with mutations in *gyrA* and *parC*. *Antimicrob Agents Chemother* 2011; **55**: 1266-9.
2. Garoff L, Yadav K, Hughes D. Increased expression of Qnr is sufficient to confer clinical resistance to ciprofloxacin in *Escherichia coli*. *J Antimicrob Chemother* 2018; **73**: 348-52.
3. Jiang X, Li J, Zhang Y et al. Detection of plasmid-mediated quinolone resistance determinants and *qnrS* expression in *Enterobacteriaceae* clinical isolates. *J Infect Dev Ctries* 2014; **8**: 1625-9.
4. Robicsek A, Strahilevitz J, Jacoby GA et al. Fluoroquinolone-modifying enzyme: a new adaptation of a common aminoglycoside acetyltransferase. *Nat Med* 2006; **12**: 83-8.
5. Huseby DL, Pietsch F, Brandis G et al. Mutation Supply and Relative Fitness Shape the Genotypes of Ciprofloxacin-Resistant *Escherichia coli*. *Mol Biol Evol* 2017; **34**: 1029-39.
6. Praski Alzrigat L, Huseby DL, Brandis G et al. Fitness cost constrains the spectrum of *marR* mutations in ciprofloxacin-resistant *Escherichia coli*. *The Journal of antimicrobial chemotherapy* 2017; **72**: 3016-24.
7. Wang H, Dzink-Fox JL, Chen M et al. Genetic characterization of highly fluoroquinolone-resistant clinical *Escherichia coli* strains from China: role of *acrR* mutations. *Antimicrob Agents Chemother* 2001; **45**: 1515-21.
8. Aly SA, Boothe DM, Suh SJ. A novel alanine to serine substitution mutation in SoxS induces overexpression of efflux pumps and contributes to multidrug resistance in clinical *Escherichia coli* isolates. *J Antimicrob Chemother* 2015; **70**: 2228-33.
9. Hansen LH, Jensen LB, Sorensen HI et al. Substrate specificity of the OqxAB multidrug resistance pump in *Escherichia coli* and selected enteric bacteria. *J Antimicrob Chemother* 2007; **60**: 145-7.
10. Yamane K, Wachino J, Suzuki S et al. New plasmid-mediated fluoroquinolone efflux pump, QepA, found in an *Escherichia coli* clinical isolate. *Antimicrob Agents Chemother* 2007; **51**: 3354-60.
11. van der Putten BCL, Remondini D, Pasquini G et al. Quantifying the contribution of four resistance mechanisms to ciprofloxacin MIC in *Escherichia coli*: a systematic review. *The Journal of antimicrobial chemotherapy* 2019; **74**: 298-310.
12. Herrera G, Aleixandra V, Urios A et al. Quinolone action in *Escherichia coli* cells carrying *gyrA* and *gyrB* mutations. *FEMS microbiology letters* 1993; **106**: 187-91.

Table S2. QUIRMIA-based resistance phenotypes vs. genotypes

| Phenotypic-based resisto-type | Observed Phe-notype | N. of isolates | Phenotype/genotype con-cordance<br>(n, %) | Phenotype/genotype dis-cordance<br>(n, %) | Resistance mechanism(s)<br>(N. of isolates)<br><br>(in bold the discrepant) | Discre-pant number | Predicted Phenotype | Clinical impact |
|-------------------------------|---------------------|----------------|-------------------------------------------|-------------------------------------------|-----------------------------------------------------------------------------|--------------------|---------------------|-----------------|
| Wild-type (WT)                | NAL ≥ 19 mm         | 142            | 138 (97.2)                                | 4 (2.8)                                   | No resistance mechanism (138)                                               |                    | NOR <sup>S</sup>    |                 |
|                               | NOR ≥ 18 mm         |                |                                           |                                           | AAC(6′)-Ib-cr (2)                                                           | 1,2                | CIP <sup>S</sup>    | mE              |
|                               |                     |                |                                           |                                           | Qnr-S1 (1)                                                                  | 3                  | LEV <sup>S</sup>    | mE              |
|                               |                     |                |                                           |                                           | OqxB + 2 marR mutations (1)                                                 | 4                  |                     | mE              |
| Low-Level Re-sistance (R1)    | NAL < 19 mm         | 139            | 135 (97.1)                                | 4 (2.9)                                   | 1 gyrA mutation (100)                                                       |                    | NOR <sup>I</sup>    |                 |
|                               | NOR ≥ 18 mm         |                |                                           |                                           | 1 gyrA mutation + 1 parC mutation (8)                                       |                    | CIP <sup>I</sup>    |                 |
|                               |                     |                |                                           |                                           | 1 gyrA mutation + Qnr-S1 (5)                                                |                    | LEV <sup>I</sup>    |                 |
|                               |                     |                |                                           |                                           | 1 gyrA mutation + Qnr-B4 (3)                                                |                    |                     |                 |
|                               |                     |                |                                           |                                           | 1 gyrA mutation + AAC(6′)-Ib-cr (1)                                         |                    |                     |                 |
|                               |                     |                |                                           |                                           | 1 gyrA mutation + 2 marR mutations (5)                                      |                    |                     |                 |
|                               |                     |                |                                           |                                           | Qnr-S1 (5)                                                                  |                    |                     |                 |
|                               |                     |                |                                           |                                           | Qnr-S1+ 2 marR mutations (1)                                                |                    |                     |                 |
|                               |                     |                |                                           |                                           | Qnr-S2 (2)                                                                  |                    |                     |                 |
|                               |                     |                |                                           |                                           | Qnr-B19 (1)                                                                 |                    |                     |                 |
|                               |                     |                |                                           |                                           | 2 gyrA mutations (4)                                                        |                    |                     |                 |
|                               |                     |                |                                           |                                           | No resistance mechanism (2)                                                 | 5,6                |                     | -               |
|                               |                     |                |                                           |                                           | 2 gyrA mutations + 1 parC mutation (1)                                      | 7                  |                     | mE              |
|                               |                     |                |                                           |                                           | 2 gyrA mutations + 1 parC mutation + OqxAB (1)                              | 8                  |                     | mE              |
| High-level re-sistance (R2)   | NAL < 19 mm         | 272            | 269 (98.9)                                | 3 (1.2)                                   | 2 gyrA mutations + 1 parC mutation (108)                                    |                    | NOR <sup>R</sup>    |                 |
|                               | NOR < 18 mm         |                |                                           |                                           |                                                                             |                    | CIP <sup>R</sup>    |                 |

2 *gyrA* mutations + 1 *parC* mutation + 1 *gyrB* mutation + 2 *marR* mutations (1) LEV<sup>R</sup>

2 *gyrA* mutations + 1 *parC* mutation + AAC(6')-Ib-*cr* (21)

2 *gyrA* mutations + 1 *parC* mutation + AAC(6')-Ib-*cr* + 1 *marR* mutation (1)

2 *gyrA* mutations + 1 *parC* mutation + OqxAB (1)

2 *gyrA* mutations + 1 *parC* mutation + OqxAB + 2 *marR* mutations (1)

2 *gyrA* mutations + 1 *parC* mutation + Qep-A2 (1)

2 *gyrA* mutations + 1 *parC* mutation + Qep-A4 (1)

2 *gyrA* mutations + 1 *parC* mutation + Qnr-B4 (2)

2 *gyrA* mutations + 1 *parC* mutation + Qnr-S1 (4)

2 *gyrA* mutations + 1 *parC* mutation + Qnr-S1 + 2 *marR* mutations (1)

2 *gyrA* mutations + 1 *parC* mutation + 1 *marR* mutations (2)

2 *gyrA* mutations + 1 *parC* mutation + 2 *marR* mutations (10)

2 *gyrA* mutations + 1 *parC* mutation + 1 *soxR* mutation (1)

2 *gyrA* mutations + 1 *parC* mutation + Qnr-S2 (1)

2 *gyrA* mutations + 2 *parC* mutations (69)

2 *gyrA* mutations + 2 *parC* mutations + 1 *marR* mutation (2)

2 *gyrA* mutations + 2 *parC* mutations + 2 *marR* mutations (2)

2 *gyrA* mutations + 2 *parC* mutations + 1 *acrR* mutation (3)

2 *gyrA* mutations + 2 *parC* mutations + AAC(6')-Ib (1)

2 *gyrA* mutations + 2 *parC* mutations + AAC(6')-Ib-*cr* (34)

2 *gyrA* mutations + 2 *parC* mutations + AAC(6')-Ib + OqxAB (1) 9 -

2 *gyrA* mutations + 2 *parC* mutations + Qnr-D2 + 2 *marR* mutations (1) 10 -

1 *gyrA* mutation (1) 11 -

1 *gyrA* mutation + 1 *parC* mutation (1)

1 *gyrA* mutation + QnrA1 (1)

|       |     |          |        |    |      |
|-------|-----|----------|--------|----|------|
| Total | 553 | 542 (98) | 11 (2) | 11 | 6 mE |
|-------|-----|----------|--------|----|------|

N, number; GT, Genotype; PT, Phenotype

**Table S3. Discrepancy table: QUIRMIA-based classification**

| Discrepant number | ST   | NAL (mm) | NOR (mm) | CIP (mm) | LEV (mm) | Resistance mechanism(s)                               | QUIRMIA-based resistotype | WGS-based resistotype |
|-------------------|------|----------|----------|----------|----------|-------------------------------------------------------|---------------------------|-----------------------|
| 1                 | 141  | 27       | 31       | 33       | 34       | <i>aac(6')-Ib-cr</i>                                  | Wild-type                 | Low-level resistance  |
| 2                 | ND   | 22       | 35       | 38       | 36       | <i>aac(6')-Ib-cr</i>                                  | Wild-type                 | Low-level resistance  |
| 3                 | 1421 | 21       | 24       | 24       | 25       | <i>qnrS1</i>                                          | Wild-type                 | Low-level resistance  |
| 4                 | ND   | 13       | 27       | 23       | 22       | -                                                     | Low-level resistance      | Wild-type             |
| 5                 | 336  | 15       | 23       | 22       | 25       | -                                                     | Low-level resistance      | Wild-type             |
| 6                 | ND   | 6        | 22       | 23       | 23       | -                                                     | Low-level resistance      | Wild-type             |
| 7                 | 162  | 6        | 19       | 18       | 19       | <i>gyrA</i> S83L/D87N, <i>parC</i> S80I               | Low-level resistance      | High-level resistance |
| 8                 | ND   | 10       | 21       | 19       | 17       | <i>gyrA</i> S83L/D87Y, <i>parC</i> S80R, <i>oqxAB</i> | Low-level resistance      | High-level resistance |
| 9                 | 131  | 6        | 17       | 20       | 21       | <i>gyrA</i> S83L                                      | High-level resistance     | Low-level resistance  |
| 10                | 73   | 6        | 14       | 18       | 20       | <i>gyrA</i> S83L, <i>parC</i> S80I                    | High-level resistance     | Low-level resistance  |
| 11                | ND   | 6        | 16       | 18       | 16       | <i>gyrA</i> S83L, <i>qnrA1</i>                        | High-level resistance     | Low-level resistance  |

ST, Sequence type; ND, not determined; NAL, Nalidixic acid (30 µg); NOR, Norfloxacin (10 µg); CIP, Ciprofloxacin (5 µg); LEV, Levofloxacin (5 µg); mE, minor Error; vME, very major error.

The phenotypes responsible for the discrepancies are highlighted in red.

Inhibition zone diameters highlighted in black bold were included for completion but were not used for the WGS classification.

**Table S4. EUCAST-based classification vs. genotypes**

| Observed Phenotype | EUCAST-based categorization | N. of isolates | Resistance mechanism(s) (N. of isolates)             | WGS-based classification  |
|--------------------|-----------------------------|----------------|------------------------------------------------------|---------------------------|
| CIP ≥ 25 mm        | Susceptible                 | 207            | No resistance mechanism (138)                        | Wild-type (138)           |
|                    |                             |                | 1 <i>gyrA</i> mutation (52)                          | Low-level resistance (69) |
|                    |                             |                | 2 <i>gyrA</i> mutations (1)                          |                           |
|                    |                             |                | 1 <i>gyrA</i> mutation + 1 <i>parC</i> mutation (2)  |                           |
|                    |                             |                | 1 <i>gyrA</i> mutation + Qnr-S1 (1)                  |                           |
|                    |                             |                | 1 <i>gyrA</i> mutation + Qnr-B4 (2)                  |                           |
|                    |                             |                | 1 <i>gyrA</i> mutation + 2 <i>marR</i> mutations (5) |                           |
|                    |                             |                | AAC(6′)-Ib- <i>cr</i> (2)                            |                           |
|                    |                             |                | Qnr-B19 (1)                                          |                           |
|                    |                             |                | Qnr-S1 (1)                                           |                           |
|                    |                             |                | Qnr-S1+ 2 <i>marR</i> mutations (1)                  |                           |
|                    |                             |                | OqxB + 2 <i>marR</i> mutations (1)                   |                           |
| CIP < 25 mm        | Resistant                   | 346            | No resistance mechanism (2)                          | Wild-type (2)             |
|                    |                             |                | 1 <i>gyrA</i> mutation (49)                          | Low-level resistance (73) |
|                    |                             |                | 2 <i>gyrA</i> mutations (3)                          |                           |
|                    |                             |                | 1 <i>gyrA</i> mutation + 1 <i>parC</i> mutation (7)  |                           |
|                    |                             |                | 1 <i>gyrA</i> mutation + Qnr-S1 (4)                  |                           |
|                    |                             |                | AAC(6′)-Ib- <i>cr</i> (1)                            |                           |

---

|                                                                                               |                             |
|-----------------------------------------------------------------------------------------------|-----------------------------|
| Qnr-A1 (1)                                                                                    |                             |
| Qnr-B4 (1)                                                                                    |                             |
| Qnr-S1 (5)                                                                                    |                             |
| Qnr-S2 (2)                                                                                    |                             |
| 2 <i>gyrA</i> mutations + 1 <i>parC</i> mutation (109)                                        | High-level resistance (271) |
| 2 <i>gyrA</i> mutations + 1 <i>parC</i> mutation + AAC(6')-Ib-cr (21)                         |                             |
| 2 <i>gyrA</i> mutations + 1 <i>parC</i> mutation + AAC(6')-Ib-cr + 1 <i>marR</i> mutation (1) |                             |
| 2 <i>gyrA</i> mutations + 1 <i>parC</i> mutation + OqxAB (2)                                  |                             |
| 2 <i>gyrA</i> mutations + 1 <i>parC</i> mutation + OqxAB + 2 <i>marR</i> mutations (1)        |                             |
| 2 <i>gyrA</i> mutations + 1 <i>parC</i> mutation + Qep-A2 (1)                                 |                             |
| 2 <i>gyrA</i> mutations + 1 <i>parC</i> mutation + Qep-A4 (1)                                 |                             |
| 2 <i>gyrA</i> mutations + 1 <i>parC</i> mutation + Qnr-B4 (2)                                 |                             |
| 2 <i>gyrA</i> mutations + 1 <i>parC</i> mutation + Qnr-S1 (4)                                 |                             |
| 2 <i>gyrA</i> mutations + 1 <i>parC</i> mutation + Qnr-S1 + 2 <i>marR</i> mutations (1)       |                             |
| 2 <i>gyrA</i> mutations + 1 <i>parC</i> mutation + Qnr-S2 (1)                                 |                             |
| 2 <i>gyrA</i> mutations + 1 <i>parC</i> mutation + 1 <i>marR</i> mutations (2)                |                             |
| 2 <i>gyrA</i> mutations + 1 <i>parC</i> mutation + 2 <i>marR</i> mutations (10)               |                             |
| 2 <i>gyrA</i> mutations + 1 <i>parC</i> mutation + 1 <i>soxR</i> mutation (1)                 |                             |
| 2 <i>gyrA</i> mutations + 2 <i>parC</i> mutations (69)                                        |                             |
| 2 <i>gyrA</i> mutations + 2 <i>parC</i> mutations + 1 <i>marR</i> mutation (2)                |                             |
| 2 <i>gyrA</i> mutations + 2 <i>parC</i> mutations + 2 <i>marR</i> mutations (2)               |                             |

---

---

2 *gyrA* mutations + 2 *parC* mutations + 1 *acrR* mutation (3)

2 *gyrA* mutations + 2 *parC* mutations + AAC(6')-Ib (1)

2 *gyrA* mutations + 2 *parC* mutations + AAC(6')-Ib-*cr* (34)

2 *gyrA* mutations + 2 *parC* mutations + AAC(6')-Ib + OqxAB (1)

2 *gyrA* mutations + 2 *parC* mutations + Qnr-D2 + 2 *marR* mutations (1)

2 *gyrA* mutations + 1 *parC* mutation + 1 *gyrB* mutation + 2 *marR* mutations (1)

---

N, number; WGS, whole-genome sequencing; CIP, ciprofloxacin

Table S5. Genotypes vs. QUIRMIA-based resistance phenotypes

| WGS-based resistotype      | Resistance mechanism(s) (N. of isolates)                                                                | Predicted phenotype | N. of isol. | Genotype/phenotype concordance (n., %) | Genotype/phenotype discordance(n., %) | Discrepant phenotypes | Discrepant number | Clinical impact |         |    |
|----------------------------|---------------------------------------------------------------------------------------------------------|---------------------|-------------|----------------------------------------|---------------------------------------|-----------------------|-------------------|-----------------|---------|----|
| Wild-type (WT)             | No resistance mechanism (140)                                                                           | NAL ≥ 19 mm         | 140         | 138 (98.6%)                            | 2 (1.4%)                              | NAL < 19 mm           |                   |                 |         |    |
|                            |                                                                                                         | NOR ≥ 18 mm         |             |                                        |                                       | NOR ≥ 18 mm           |                   |                 | 1,2     | mE |
| Low-Level Resistance (R1)  | 1 <i>gyrA</i> mutation (101)                                                                            | NAL < 19 mm         | 142         | 135 (95.1%)                            | 7 (4.9%)                              | NAL ≥ 19 mm           |                   |                 |         |    |
|                            | 1 <i>gyrA</i> mutation + 1 <i>parC</i> mutation (9)                                                     | NOR ≥ 18 mm         |             |                                        |                                       | NOR ≥ 18 mm           |                   |                 | 3,4,5,6 |    |
|                            | 1 <i>gyrA</i> mutation + Qnr-A1 (1)                                                                     |                     |             |                                        |                                       | NAL < 19 mm           |                   |                 |         |    |
|                            | 1 <i>gyrA</i> mutation + Qnr-S1 (5)                                                                     |                     |             |                                        |                                       | NOR < 18 mm           |                   |                 | 7,8,9   | mE |
|                            | 1 <i>gyrA</i> mutation + Qnr-B4 (3)                                                                     |                     |             |                                        |                                       |                       |                   |                 |         |    |
|                            | 1 <i>gyrA</i> mutation + AAC(6')-Ib-cr (1)                                                              |                     |             |                                        |                                       |                       |                   |                 |         |    |
|                            | 1 <i>gyrA</i> mutation + 2 <i>marR</i> mutations (5)                                                    |                     |             |                                        |                                       |                       |                   |                 |         |    |
|                            | 2 <i>gyrA</i> mutations (4)                                                                             |                     |             |                                        |                                       |                       |                   |                 |         |    |
|                            | AAC(6')-Ib-cr (2)                                                                                       |                     |             |                                        |                                       |                       |                   |                 |         |    |
|                            | Qnr-S1 (6)                                                                                              |                     |             |                                        |                                       |                       |                   |                 |         |    |
|                            | Qnr-S1 + 2 <i>marR</i> mutations (1)                                                                    |                     |             |                                        |                                       |                       |                   |                 |         |    |
|                            | Qnr-S2 (2)                                                                                              |                     |             |                                        |                                       |                       |                   |                 |         |    |
|                            | Qnr-B19 (1)                                                                                             |                     |             |                                        |                                       |                       |                   |                 |         |    |
|                            | OqxB + 2 <i>marR</i> mutations (1)                                                                      |                     |             |                                        |                                       |                       |                   |                 |         |    |
| High-level resistance (R2) | 2 <i>gyrA</i> mutations + 1 <i>parC</i> mutation + 1 <i>gyrB</i> mutation + 2 <i>marR</i> mutations (1) | NAL < 19 mm         | 271         | 269 (99.3%)                            | 2 (0.7%)                              | NAL < 19 mm           | 10,11             | -               |         |    |
|                            | 2 <i>gyrA</i> mutations + 1 <i>parC</i> mutation (109)                                                  | NOR < 18 mm         |             |                                        |                                       | NOR ≥ 18 mm           |                   |                 |         |    |

2 *gyrA* mutations + 1 *parC* mutation + AAC(6')-Ib-*cr* (21)

2 *gyrA* mutations + 1 *parC* mutation + AAC(6')-Ib-*cr* + 1 *marR* mutation (1)

2 *gyrA* mutations + 1 *parC* mutation + OqxAB (2)

2 *gyrA* mutations + 1 *parC* mutation + OqxAB + 2 *marR* mutations (1)

2 *gyrA* mutations + 1 *parC* mutation + Qep-A2 (1)

2 *gyrA* mutations + 1 *parC* mutation + Qep-A4 (1)

2 *gyrA* mutations + 1 *parC* mutation + Qnr-B4 (2)

2 *gyrA* mutations + 1 *parC* mutation + Qnr-S1 (4)

2 *gyrA* mutations + 1 *parC* mutation + Qnr-S1 + 2 *marR* mutations (1)

2 *gyrA* mutations + 1 *parC* mutation + Qnr-S2 (1)

2 *gyrA* mutations + 1 *parC* mutation + 1 *marR* mutations (2)

2 *gyrA* mutations + 1 *parC* mutation + 2 *marR* mutations (10)

2 *gyrA* mutations + 1 *parC* mutation + 1 *soxR* mutation (1)

2 *gyrA* mutations + 2 *parC* mutations (69)

2 *gyrA* mutations + 2 *parC* mutations + 1 *marR* mutation (2)

2 *gyrA* mutations + 2 *parC* mutations + 2 *marR* mutations (2)

2 *gyrA* mutations + 2 *parC* mutations + 1 *acrR* mutation (3)

2 *gyrA* mutations + 2 *parC* mutations + AAC(6')-Ib (1)

2 *gyrA* mutations + 2 *parC* mutations + AAC(6')-Ib-*cr* (34)

2 *gyrA* mutations + 2 *parC* mutations + AAC(6')-Ib + OqxAB (1)

2 *gyrA* mutations + 2 *parC* mutations + Qnr-D2 + 2 *marR* mutations (1)

**Total**

**553**

**542 (98%)**

**11 (2 %)**

**5 mE**

N., number; NAL, nalidixic acid; NOR, norfloxacin; mE, minor error.

**Table S6. Discrepancy table: WGS-based classification**

| Discrepant number | ST        | NAL (mm) | NOR (mm) | CIP (mm)  | LEV (mm)  | Resistance mechanism(s)                 | WGS-based resistotype | Observed resistotype  | Clinical impact |
|-------------------|-----------|----------|----------|-----------|-----------|-----------------------------------------|-----------------------|-----------------------|-----------------|
| 1                 | Not found | 13       | 27       | <b>23</b> | <b>22</b> | -                                       | Wild-type             | Low-level resistance  | mE              |
| 2                 | 336       | 15       | 23       | <b>22</b> | <b>25</b> | -                                       | Wild-type             | Low-level resistance  | mE              |
| 3                 | 141       | 27       | 31       | <b>33</b> | <b>34</b> | <i>aac(6')-Ib-cr</i>                    | Low-level resistance  | Wild-type             | -               |
| 4                 | Not found | 22       | 35       | <b>38</b> | <b>36</b> | <i>aac(6')-Ib-cr</i>                    | Low-level resistance  | Wild-type             | -               |
| 5                 | 1421      | 21       | 24       | <b>24</b> | <b>25</b> | <i>qnrS1</i>                            | Low-level resistance  | Wild-type             | -               |
| 6                 | Not found | 21       | 33       | <b>36</b> | <b>35</b> | <i>oqxB, marR Y137H/G103S</i>           | Low-level resistance  | Wild-type             | -               |
| 7                 | 131       | 6        | 17       | <b>20</b> | <b>21</b> | <i>gyrA S83L</i>                        | Low-level resistance  | High-level resistance | mE              |
| 8                 | Not found | 6        | 16       | <b>18</b> | <b>16</b> | <i>gyrA S83L, qnrA1</i>                 | Low-level resistance  | High-level resistance | mE              |
| 9                 | 73        | 6        | 14       | <b>18</b> | <b>20</b> | <i>gyrA S83L, parC S80I</i>             | Low-level resistance  | High-level resistance | mE              |
| 10                | Not found | 10       | 21       | <b>19</b> | <b>17</b> | <i>gyrA S83L/D87Y, parC S80R, oqxAB</i> | High-level resistance | Low-level resistance  | -               |
| 11                | 162       | 6        | 19       | <b>18</b> | <b>19</b> | <i>gyrA S83L/D87N, parC S80I</i>        | High-level resistance | Low-level resistance  | -               |

Phenotypes responsible for the discrepancy are highlighted in red. Inhibition zone diameters highlighted in black bold were included for completion but were not used for the phenotype-based classification.

ST, Sequence type; NAL, Nalidixic acid (30 µg); NOR, Norfloxacin (10 µg); CIP, Ciprofloxacin (5 µg); LEV, Levofloxacin (5 µg); mE, minor Error; vME, very major error.

Table S7. Genotypes vs. EUCAST-based categorization

| WGS-based resistotype     | Resistance mechanism(s) (N. of isolates)             | Observed phenotype | EUCAST-based categorization | N. of isolates |
|---------------------------|------------------------------------------------------|--------------------|-----------------------------|----------------|
| Wild-type (WT)            | No resistance mechanism (140)                        | CIP ≥ 25 mm        | Susceptible                 | 138 (98.6%)    |
|                           |                                                      | CIP < 25 mm        | Resistant                   | 2 (1.4%)       |
| Low-Level Resistance (R1) | 1 <i>gyrA</i> mutation (52)                          | CIP ≥ 25 mm        | Susceptible                 | 69 (48.6%)     |
|                           | 2 <i>gyrA</i> mutations (1)                          |                    |                             |                |
|                           | 1 <i>gyrA</i> mutation + 1 <i>parC</i> mutation (2)  |                    |                             |                |
|                           | 1 <i>gyrA</i> mutation + Qnr-S1 (1)                  |                    |                             |                |
|                           | 1 <i>gyrA</i> mutation + Qnr-B4 (2)                  |                    |                             |                |
|                           | 1 <i>gyrA</i> mutation + 2 <i>marR</i> mutations (5) |                    |                             |                |
|                           | AAC(6')-Ib- <i>cr</i> (2)                            |                    |                             |                |
|                           | Qnr-B19 (1)                                          |                    |                             |                |
|                           | Qnr-S1 (1)                                           |                    |                             |                |
|                           | Qnr-S1+ 2 <i>marR</i> mutations (1)                  |                    |                             |                |
|                           | OqxB + 2 <i>marR</i> mutations (1)                   |                    |                             |                |
|                           | 1 <i>gyrA</i> mutation (49)                          | CIP < 25 mm        | Resistant                   | 73 (51.4%)     |
|                           | 2 <i>gyrA</i> mutations (3)                          |                    |                             |                |
|                           | 1 <i>gyrA</i> mutation + 1 <i>parC</i> mutation (7)  |                    |                             |                |
|                           | 1 <i>gyrA</i> mutation + Qnr-S1 (4)                  |                    |                             |                |
|                           | AAC(6')-Ib- <i>cr</i> (1)                            |                    |                             |                |
|                           | Qnr-A1 (1)                                           |                    |                             |                |
|                           | Qnr-B4 (1)                                           |                    |                             |                |
|                           |                                                      |                    |                             |                |

Qnr-S1 (5)

Qnr-S2 (2)

|                                   |                                                                                                         |             |           |            |
|-----------------------------------|---------------------------------------------------------------------------------------------------------|-------------|-----------|------------|
| <b>High-level resistance (R2)</b> | 2 <i>gyrA</i> mutations + 1 <i>parC</i> mutation + 1 <i>gyrB</i> mutation + 2 <i>marR</i> mutations (1) | CIP < 25 mm | Resistant | 271 (100%) |
|                                   | 2 <i>gyrA</i> mutations + 1 <i>parC</i> mutation (109)                                                  |             |           |            |
|                                   | 2 <i>gyrA</i> mutations + 1 <i>parC</i> mutation + AAC(6')-Ib- <i>cr</i> (21)                           |             |           |            |
|                                   | 2 <i>gyrA</i> mutations + 1 <i>parC</i> mutation + AAC(6')-Ib- <i>cr</i> + 1 <i>marR</i> mutation (1)   |             |           |            |
|                                   | 2 <i>gyrA</i> mutations + 1 <i>parC</i> mutation + OqxAB (2)                                            |             |           |            |
|                                   | 2 <i>gyrA</i> mutations + 1 <i>parC</i> mutation + OqxAB + 2 <i>marR</i> mutations (1)                  |             |           |            |
|                                   | 2 <i>gyrA</i> mutations + 1 <i>parC</i> mutation + Qep-A2 (1)                                           |             |           |            |
|                                   | 2 <i>gyrA</i> mutations + 1 <i>parC</i> mutation + Qep-A4 (1)                                           |             |           |            |
|                                   | 2 <i>gyrA</i> mutations + 1 <i>parC</i> mutation + Qnr-B4 (2)                                           |             |           |            |
|                                   | 2 <i>gyrA</i> mutations + 1 <i>parC</i> mutation + Qnr-S1 (4)                                           |             |           |            |
|                                   | 2 <i>gyrA</i> mutations + 1 <i>parC</i> mutation + Qnr-S1 + 2 <i>marR</i> mutations (1)                 |             |           |            |
|                                   | 2 <i>gyrA</i> mutations + 1 <i>parC</i> mutation + Qnr-S2 (1)                                           |             |           |            |
|                                   | 2 <i>gyrA</i> mutations + 1 <i>parC</i> mutation + 1 <i>marR</i> mutations (2)                          |             |           |            |
|                                   | 2 <i>gyrA</i> mutations + 1 <i>parC</i> mutation + 2 <i>marR</i> mutations (10)                         |             |           |            |
|                                   | 2 <i>gyrA</i> mutations + 1 <i>parC</i> mutation + 1 <i>soxR</i> mutation (1)                           |             |           |            |
|                                   | 2 <i>gyrA</i> mutations + 2 <i>parC</i> mutations (69)                                                  |             |           |            |
|                                   | 2 <i>gyrA</i> mutations + 2 <i>parC</i> mutations + 1 <i>marR</i> mutation (2)                          |             |           |            |
|                                   | 2 <i>gyrA</i> mutations + 2 <i>parC</i> mutations + 2 <i>marR</i> mutations (2)                         |             |           |            |
|                                   | 2 <i>gyrA</i> mutations + 2 <i>parC</i> mutations + 1 <i>acrR</i> mutation (3)                          |             |           |            |
|                                   | 2 <i>gyrA</i> mutations + 2 <i>parC</i> mutations + AAC(6')-Ib (1)                                      |             |           |            |
|                                   | 2 <i>gyrA</i> mutations + 2 <i>parC</i> mutations + AAC(6')-Ib- <i>cr</i> (34)                          |             |           |            |

2 *gyrA* mutations + 2 *parC* mutations + AAC(6')-Ib + OqxAB (1)

2 *gyrA* mutations + 2 *parC* mutations + Qnr-D2 + 2 *marR* mutations (1)

**Total**

**553**

---

N., number; CIP, ciprofloxacin.

**Table S8. Clinical isolates used in this study**

| N. | NAL<br>(mm) | CIP<br>(mm) | NOR<br>(mm) | LEV<br>(mm) | Mutation  |           |               |              |          |      |      | Resistotype<br>based on<br>CIP pheno-<br>type | Resistotype<br>based on<br>NOR phe-<br>notype | Resistotype<br>based on<br>LEV pheno-<br>type | Resistotype<br>based on<br>genotype | Beta-<br>lactamase<br>production |
|----|-------------|-------------|-------------|-------------|-----------|-----------|---------------|--------------|----------|------|------|-----------------------------------------------|-----------------------------------------------|-----------------------------------------------|-------------------------------------|----------------------------------|
|    |             |             |             |             | GyrA      | ParC      | Others        | MarR         | AcrR     | SoxR | RpoB |                                               |                                               |                                               |                                     |                                  |
| 1  | 7           | 23          | 22          | 30          | S83L      |           | Aac(6')-Ib-cr |              |          |      |      | R1                                            | R1                                            | R1                                            | R1                                  | ESBL                             |
| 2  | 6           | 6           | 6           | 10          | S83L/D87N | S80I      |               | G103S, Y137H |          |      |      | R2                                            | R2                                            | R2                                            | R2                                  | Carba                            |
| 3  | 7           | 22          | 24          | 22          | S83L      |           |               |              |          |      |      | R1                                            | R1                                            | R1                                            | R1                                  | ESBL                             |
| 4  | 6           | 24          | 29          | 24          | S83L      |           |               |              |          |      |      | R1                                            | R1                                            | R1                                            | R1                                  | WT                               |
| 5  | 7           | 25          | 26          | 22          | S83L      |           |               |              |          |      |      | R1                                            | R1                                            | R1                                            | R1                                  | WT                               |
| 6  | 7           | 22          | 26          | 21          | S83L      |           |               |              |          |      |      | R1                                            | R1                                            | R1                                            | R1                                  | ESBL                             |
| 7  | 6           | 6           | 6           | 10          | S83L/D87N | S80I/E84V |               |              |          |      |      | R2                                            | R2                                            | R2                                            | R2                                  | ESBL                             |
| 8  | 26          | 36          | 35          | 35          |           |           |               |              |          |      |      | WT                                            | WT                                            | WT                                            | WT                                  | WT                               |
| 9  | 6           | 25          | 23          | 23          | D87G      |           |               |              |          |      |      | R1                                            | R1                                            | R1                                            | R1                                  | WT                               |
| 10 | 6           | 13          | 11          | 11          | S83L/D87N | S80I      |               |              |          |      |      | R2                                            | R2                                            | R2                                            | R2                                  | ESBL                             |
| 11 | 6           | 6           | 6           | 10          | S83L/D87N | S80I/E84V |               |              |          |      |      | R2                                            | R2                                            | R2                                            | R2                                  | WT                               |
| 12 | 6           | 6           | 6           | 6           | S83L/D87N | S80I/E84V |               |              |          |      |      | R2                                            | R2                                            | R2                                            | R2                                  | ESBL                             |
| 13 | 6           | 6           | 6           | 6           | S83L/D87N | S80I/E84V |               |              | E67trunc |      |      | R2                                            | R2                                            | R2                                            | R2                                  | WT                               |
| 14 | 6           | 6           | 6           | 6           | S83L/D87Y | S80I/E84V |               |              | H115Y    |      |      | R2                                            | R2                                            | R2                                            | R2                                  | WT                               |
| 15 | 6           | 6           | 6           | 13          | S83L/D87N | S80I      |               |              |          |      |      | R2                                            | R2                                            | R2                                            | R2                                  | WT                               |
| 16 | 6           | 9           | 6           | 11          | S83L/D87N | S80I      |               |              |          |      |      | R2                                            | R2                                            | R2                                            | R2                                  | WT                               |
| 17 | 6           | 6           | 6           | 6           | S83L/D87N | S80I      |               |              |          |      |      | R2                                            | R2                                            | R2                                            | R2                                  | ESBL                             |
| 18 | 6           | 6           | 6           | 6           | S83L/D87N | S80I      |               |              |          |      |      | R2                                            | R2                                            | R2                                            | R2                                  | WT                               |
| 19 | 26          | 30          | 28          | 28          |           |           |               |              |          |      |      | WT                                            | WT                                            | WT                                            | WT                                  | WT                               |
| 20 | 6           | 24          | 22          | 23          | S83L      |           |               |              |          |      |      | R1                                            | R1                                            | R1                                            | R1                                  | WT                               |
| 21 | 6           | 6           | 6           | 6           | S83L/D87N | S80I      |               |              |          |      |      | R2                                            | R2                                            | R2                                            | R2                                  | WT                               |
| 22 | 6           | 6           | 6           | 6           | S83L/D87N | S80I      | Qep-A2        |              |          |      |      | R2                                            | R2                                            | R2                                            | R2                                  | ESBL                             |
| 23 | 27          | 28          | 26          | 29          |           |           |               |              |          |      |      | WT                                            | WT                                            | WT                                            | WT                                  | WT                               |
| 24 | 6           | 15          | 12          | 17          | S83L/D87N | S80I      |               |              |          |      |      | R2                                            | R2                                            | R2                                            | R2                                  | WT                               |
| 25 | 27          | 34          | 31          | 36          |           |           |               |              |          |      |      | WT                                            | WT                                            | WT                                            | WT                                  | WT                               |
| 26 | 7           | 19          | 28          | 19          | S83L      |           |               |              |          |      |      | R1                                            | R1                                            | R1                                            | R1                                  | WT                               |
| 27 | 6           | 6           | 6           | 9           | S83L/D87N | S80I      |               |              |          |      |      | R2                                            | R2                                            | R2                                            | R2                                  | WT                               |
| 28 | 6           | 6           | 6           | 10          | S83L/D87N | S80I/E84V |               |              |          |      |      | R2                                            | R2                                            | R2                                            | R2                                  | WT                               |
| 29 | 6           | 6           | 6           | 10          | S83L/D87N | S80I/E84V |               |              |          |      |      | R2                                            | R2                                            | R2                                            | R2                                  | WT                               |

|    |    |    |    |    |           |           |  |  |          |  |  |    |    |    |    |      |
|----|----|----|----|----|-----------|-----------|--|--|----------|--|--|----|----|----|----|------|
| 30 | 24 | 30 | 23 | 25 |           |           |  |  |          |  |  | WT | WT | WT | WT | WT   |
| 31 | 6  | 6  | 6  | 9  | S83L/D87N | S80I/E84V |  |  |          |  |  | R2 | R2 | R2 | R2 | WT   |
| 32 | 21 | 33 | 30 | 30 |           |           |  |  |          |  |  | WT | WT | WT | WT | WT   |
| 33 | 24 | 31 | 29 | 29 |           |           |  |  |          |  |  | WT | WT | WT | WT | ESBL |
| 34 | 6  | 6  | 6  | 6  | S83L/D87N | S80I      |  |  |          |  |  | R2 | R2 | R2 | R2 | ESBL |
| 35 | 6  | 6  | 6  | 9  | S83L/D87N | S80I/E84V |  |  | K55trunc |  |  | R2 | R2 | R2 | R2 | ESBL |
| 36 | 6  | 26 | 25 | 23 | S83L      |           |  |  |          |  |  | R1 | R1 | R1 | R1 | WT   |
| 37 | 28 | 37 | 32 | 34 |           |           |  |  |          |  |  | WT | WT | WT | WT | WT   |
| 38 | 6  | 6  | 6  | 8  | S83L/D87N | S80I      |  |  |          |  |  | R2 | R2 | R2 | R2 | WT   |
| 39 | 6  | 6  | 6  | 6  | S83L/D87N | S80I/E84V |  |  |          |  |  | R2 | R2 | R2 | R2 | WT   |
| 40 | 6  | 6  | 6  | 10 | S83L/D87N | S80I      |  |  |          |  |  | R2 | R2 | R2 | R2 | WT   |
| 41 | 25 | 37 | 37 | 35 |           |           |  |  |          |  |  | WT | WT | WT | WT | WT   |
| 42 | 29 | 37 | 36 | 36 |           |           |  |  |          |  |  | WT | WT | WT | WT | WT   |
| 43 | 9  | 23 | 21 | 24 | S83L      | S80I      |  |  |          |  |  | R1 | R1 | R1 | R1 | WT   |
| 44 | 6  | 6  | 6  | 11 | S83L/D87N | S80I      |  |  |          |  |  | R2 | R2 | R2 | R2 | WT   |
| 45 | 6  | 6  | 6  | 11 | S83L/D87N | S80I      |  |  |          |  |  | R2 | R2 | R2 | R2 | WT   |
| 46 | 26 | 37 | 35 | 37 |           |           |  |  |          |  |  | WT | WT | WT | WT | WT   |
| 47 | 6  | 6  | 6  | 11 | S83L/D87N | S80I/E84V |  |  |          |  |  | R2 | R2 | R2 | R2 | ESBL |
| 48 | 6  | 6  | 6  | 6  | S83L/D87N | S80I      |  |  |          |  |  | R2 | R2 | R2 | R2 | WT   |
| 49 | 6  | 6  | 6  | 6  | S83L/D87N | S80I/E84G |  |  |          |  |  | R2 | R2 | R2 | R2 | WT   |
| 50 | 6  | 6  | 6  | 6  | S83L/D87N | S80I      |  |  |          |  |  | R2 | R2 | R2 | R2 | WT   |
| 51 | 6  | 6  | 6  | 6  | S83L/D87N | S80I/E84G |  |  |          |  |  | R2 | R2 | R2 | R2 | WT   |
| 52 | 26 | 35 | 33 | 35 |           |           |  |  |          |  |  | WT | WT | WT | WT | WT   |
| 53 | 6  | 6  | 6  | 8  | S83L/D87N | S80I/E84V |  |  |          |  |  | R2 | R2 | R2 | R2 | ESBL |
| 54 | 6  | 6  | 6  | 6  | S83L/D87N | S80I/E84V |  |  |          |  |  | R2 | R2 | R2 | R2 | ESBL |
| 55 | 6  | 6  | 6  | 6  | S83L/D87N | S80I      |  |  |          |  |  | R2 | R2 | R2 | R2 | ESBL |
| 56 | 24 | 36 | 34 | 34 |           |           |  |  |          |  |  | WT | WT | WT | WT | WT   |
| 57 | 6  | 18 | 19 | 19 | S83L/D87N | S80I      |  |  |          |  |  | R1 | R1 | R1 | R2 | WT   |
| 58 | 6  | 6  | 6  | 10 | S83L/D87N | S80I      |  |  |          |  |  | R2 | R2 | R2 | R2 | WT   |
| 59 | 6  | 6  | 6  | 11 | S83L/D87N | S80I/E84V |  |  |          |  |  | R2 | R2 | R2 | R2 | ESBL |
| 60 | 6  | 28 | 24 | 25 | S83L/D87G |           |  |  |          |  |  | R1 | R1 | R1 | R1 | WT   |
| 61 | 6  | 6  | 6  | 8  | S83L/D87N | S80I/E84V |  |  |          |  |  | R2 | R2 | R2 | R2 | ESBL |
| 62 | 30 | 37 | 37 | 37 |           |           |  |  |          |  |  | WT | WT | WT | WT | WT   |

|    |    |    |    |    |           |           |               |  |  |  |  |    |    |    |    |      |
|----|----|----|----|----|-----------|-----------|---------------|--|--|--|--|----|----|----|----|------|
| 63 | 26 | 31 | 31 | 30 |           |           |               |  |  |  |  | WT | WT | WT | WT | WT   |
| 64 | 15 | 28 | 29 | 26 |           |           | Qnr-S1        |  |  |  |  | R1 | R1 | R1 | R1 | WT   |
| 65 | 21 | 31 | 29 | 29 |           |           |               |  |  |  |  | WT | WT | WT | WT | WT   |
| 66 | 6  | 12 | 12 | 14 | S83L/D87N | S80I      |               |  |  |  |  | R2 | R2 | R2 | R2 | WT   |
| 67 | 6  | 6  | 6  | 9  | S83L/D87N | S80I      |               |  |  |  |  | R2 | R2 | R2 | R2 | WT   |
| 68 | 6  | 6  | 6  | 6  | S83L/D87N | E84K      |               |  |  |  |  | R2 | R2 | R2 | R2 | WT   |
| 69 | 6  | 27 | 24 | 27 | S83L      |           |               |  |  |  |  | R1 | R1 | R1 | R1 | ESBL |
| 70 | 6  | 6  | 6  | 6  | S83L/D87N | S80I      |               |  |  |  |  | R2 | R2 | R2 | R2 | WT   |
| 71 | 6  | 23 | 23 | 21 | S83L/D87G |           |               |  |  |  |  | R1 | R1 | R1 | R1 | WT   |
| 72 | 26 | 34 | 36 | 34 |           |           |               |  |  |  |  | WT | WT | WT | WT | WT   |
| 73 | 6  | 6  | 6  | 12 | S83L/D87N | S80I      |               |  |  |  |  | R2 | R2 | R2 | R2 | WT   |
| 74 | 6  | 15 | 13 | 15 | S83L/D87N | S80I      |               |  |  |  |  | R2 | R2 | R2 | R2 | WT   |
| 75 | 6  | 11 | 6  | 15 | S83L/D87N | S80I      |               |  |  |  |  | R2 | R2 | R2 | R2 | WT   |
| 76 | 6  | 19 | 20 | 19 | S83L      |           | Qnr-S1        |  |  |  |  | R1 | R1 | R1 | R1 | WT   |
| 77 | 6  | 6  | 6  | 10 | S83L/D87N | S80I      |               |  |  |  |  | R2 | R2 | R2 | R2 | ESBL |
| 78 | 27 | 38 | 35 | 37 |           |           |               |  |  |  |  | WT | WT | WT | WT | ESBL |
| 79 | 6  | 6  | 6  | 12 | S83L/D87N | S80I/E84V |               |  |  |  |  | R2 | R2 | R2 | R2 | ESBL |
| 80 | 6  | 6  | 6  | 12 | S83L/D87N | S80I      |               |  |  |  |  | R2 | R2 | R2 | R2 | WT   |
| 81 | 6  | 6  | 6  | 9  | S83L/D87N | S80I/E84V |               |  |  |  |  | R2 | R2 | R2 | R2 | ESBL |
| 82 | 6  | 13 | 10 | 14 | S83L/D87N | S80I      |               |  |  |  |  | R2 | R2 | R2 | R2 | ESBL |
| 83 | 6  | 14 | 10 | 14 | S83L/D87H | S80R      |               |  |  |  |  | R2 | R2 | R2 | R2 | WT   |
| 84 | 23 | 30 | 31 | 31 |           |           |               |  |  |  |  | WT | WT | WT | WT | WT   |
| 85 | 6  | 6  | 6  | 8  | S83L/D87N | S80I/E84G |               |  |  |  |  | R2 | R2 | R2 | R2 | WT   |
| 86 | 6  | 6  | 6  | 13 | S83L/D87N | S80I/E84V | AAC(6')-Ib-cr |  |  |  |  | R2 | R2 | R2 | R2 | WT   |
| 87 | 6  | 6  | 6  | 9  | S83L/D87N | S80I      | AAC(6')-Ib-cr |  |  |  |  | R2 | R2 | R2 | R2 | WT   |
| 88 | 6  | 6  | 6  | 9  | S83L/D87N | S80I      | AAC(6')-Ib-cr |  |  |  |  | R2 | R2 | R2 | R2 | WT   |
| 89 | 6  | 8  | 6  | 10 | S83L/D87N | S80I/E84V |               |  |  |  |  | R2 | R2 | R2 | R2 | WT   |
| 90 | 6  | 6  | 6  | 6  | S83L/D87N | S80I/E84V | AAC(6')-Ib-cr |  |  |  |  | R2 | R2 | R2 | R2 | WT   |
| 91 | 25 | 35 | 36 | 33 |           |           |               |  |  |  |  | WT | WT | WT | WT | WT   |
| 92 | 6  | 26 | 26 | 27 | S83L      |           |               |  |  |  |  | R1 | R1 | R1 | R1 | WT   |
| 93 | 6  | 6  | 6  | 12 | S83L/D87N | S80I/E84V | AAC(6')-Ib-cr |  |  |  |  | R2 | R2 | R2 | R2 | ESBL |
| 94 | 6  | 26 | 27 | 25 | S83L      |           | Qnr-B4        |  |  |  |  | R1 | R1 | R1 | R1 | ESBL |
| 95 | 6  | 26 | 27 | 25 | S83L      |           | Qnr-B4        |  |  |  |  | R1 | R1 | R1 | R1 | ESBL |

|     |    |    |    |    |           |           |               |  |  |      |  |    |    |    |    |      |
|-----|----|----|----|----|-----------|-----------|---------------|--|--|------|--|----|----|----|----|------|
| 96  | 30 | 33 | 36 | 34 |           |           |               |  |  |      |  | WT | WT | WT | WT | WT   |
| 97  | 6  | 6  | 6  | 6  | S83L/D87N | S80I/E84V | AAC(6')-Ib-cr |  |  |      |  | R2 | R2 | R2 | R2 | WT   |
| 98  | 6  | 6  | 6  | 10 | S83L/D87N | S80I/E84V | AAC(6')-Ib-cr |  |  |      |  | R2 | R2 | R2 | R2 | WT   |
| 99  | 6  | 11 | 12 | 14 | S83L/D87N | S80I      |               |  |  |      |  | R2 | R2 | R2 | R2 | ESBL |
| 100 | 6  | 9  | 10 | 9  | S83L/D87N | S80I      | Qnr-S1        |  |  |      |  | R2 | R2 | R2 | R2 | ESBL |
| 101 | 22 | 32 | 29 | 32 |           |           |               |  |  |      |  | WT | WT | WT | WT | ESBL |
| 102 | 22 | 32 | 29 | 32 |           |           |               |  |  |      |  | WT | WT | WT | WT | ESBL |
| 103 | 6  | 6  | 6  | 6  | S83L/D87N | S80I      |               |  |  |      |  | R2 | R2 | R2 | R2 | WT   |
| 104 | 6  | 12 | 10 | 16 | S83L/D87N | S80I      |               |  |  |      |  | R2 | R2 | R2 | R2 | WT   |
| 105 | 6  | 24 | 19 | 23 | S83L      |           |               |  |  |      |  | R1 | R1 | R1 | R1 | ESBL |
| 106 | 6  | 24 | 20 | 23 | S83L      |           |               |  |  |      |  | R1 | R1 | R1 | R1 | ESBL |
| 107 | 6  | 13 | 6  | 15 | S83L/D87N | S80I      |               |  |  |      |  | R2 | R2 | R2 | R2 | ESBL |
| 108 | 6  | 11 | 10 | 11 | S83L/D87N | S80I      |               |  |  |      |  | R2 | R2 | R2 | R2 | WT   |
| 109 | 6  | 16 | 17 | 21 | S83L/D87N | S80I      |               |  |  |      |  | R2 | R2 | R1 | R2 | WT   |
| 110 | 6  | 26 | 27 | 26 | S83L      |           |               |  |  |      |  | R1 | R1 | R1 | R1 | WT   |
| 111 | 6  | 6  | 6  | 6  | S83L/D87N | S80I      | Qnr-B4        |  |  |      |  | R2 | R2 | R2 | R2 | ESBL |
| 112 | 6  | 6  | 6  | 6  | S83L/D87N | S80I      | AAC(6')-Ib-cr |  |  |      |  | R2 | R2 | R2 | R2 | WT   |
| 113 | 6  | 23 | 22 | 23 | S83L      |           |               |  |  |      |  | R1 | R1 | R1 | R1 | WT   |
| 114 | 6  | 35 | 12 | 34 | S83L/D87N | S80I      |               |  |  |      |  | R2 | R2 | R2 | R2 | WT   |
| 115 | 6  | 21 | 19 | 24 | S83L      |           |               |  |  |      |  | R1 | R1 | R1 | R1 | WT   |
| 116 | 28 | 33 | 31 | 33 |           |           |               |  |  |      |  | WT | WT | WT | WT | WT   |
| 117 | 22 | 30 | 29 | 28 |           |           |               |  |  |      |  | WT | WT | WT | WT | WT   |
| 118 | 27 | 33 | 31 | 34 |           |           | AAC(6')-Ib-cr |  |  |      |  | WT | WT | WT | R1 | WT   |
| 119 | 6  | 7  | 6  | 16 | S83L/D87N | S80I      |               |  |  | R20L |  | R2 | R2 | R2 | R2 | ESBL |
| 120 | 6  | 12 | 12 | 14 | S83L/D87N | S80I      |               |  |  |      |  | R2 | R2 | R2 | R2 | WT   |
| 121 | 6  | 6  | 6  | 6  | S83L/D87N | S80I/E84K |               |  |  |      |  | R2 | R2 | R2 | R2 | WT   |
| 122 | 6  | 6  | 6  | 9  | S83L/D87N | S80I/E84V | AAC(6')-Ib-cr |  |  |      |  | R2 | R2 | R2 | R2 | ESBL |
| 123 | 6  | 6  | 6  | 11 | S83L/D87N | S80I/E84V | AAC(6')-Ib-cr |  |  |      |  | R2 | R2 | R2 | R2 | WT   |
| 124 | 13 | 26 | 29 | 30 | D87Y      |           |               |  |  |      |  | R1 | R1 | R1 | R1 | WT   |
| 125 | 6  | 29 | 28 | 29 | S83L      |           |               |  |  |      |  | R1 | R1 | R1 | R1 | WT   |
| 126 | 6  | 6  | 6  | 12 | S83L/D87N | S80I/E84V | AAC(6')-Ib-cr |  |  |      |  | R2 | R2 | R2 | R2 | WT   |
| 127 | 6  | 8  | 6  | 13 | S83L/D87N | S80I      |               |  |  |      |  | R2 | R2 | R2 | R2 | WT   |
| 128 | 26 | 36 | 32 | 33 |           |           |               |  |  |      |  | WT | WT | WT | WT | WT   |

|     |    |    |    |    |           |             |               |  |  |  |  |    |    |    |    |      |
|-----|----|----|----|----|-----------|-------------|---------------|--|--|--|--|----|----|----|----|------|
| 129 | 24 | 35 | 34 | 30 |           |             |               |  |  |  |  | WT | WT | WT | WT | WT   |
| 130 | 24 | 40 | 36 | 34 |           |             |               |  |  |  |  | WT | WT | WT | WT | WT   |
| 131 | 6  | 28 | 27 | 27 | S83L      |             |               |  |  |  |  | R1 | R1 | R1 | R1 | WT   |
| 132 | 6  | 6  | 6  | 6  | S83L/D87N | S80I/E84V   |               |  |  |  |  | R2 | R2 | R2 | R2 | WT   |
| 133 | 6  | 6  | 6  | 10 | S83L/D87N | S80I/E84V   |               |  |  |  |  | R2 | R2 | R2 | R2 | ESBL |
| 134 | 26 | 34 | 35 | 36 |           |             |               |  |  |  |  | WT | WT | WT | WT | WT   |
| 135 | 6  | 12 | 10 | 15 | S83L/D87N | S80I        |               |  |  |  |  | R2 | R2 | R2 | R2 | WT   |
| 136 | 6  | 9  | 6  | 11 | S83L/D87N | S80I        |               |  |  |  |  | R2 | R2 | R2 | R2 | WT   |
| 137 | 6  | 9  | 6  | 9  | S83L/D87N | S80I        |               |  |  |  |  | R2 | R2 | R2 | R2 | WT   |
| 138 | 6  | 25 | 23 | 26 | S83L      | S80I        |               |  |  |  |  | R1 | R1 | R1 | R1 | WT   |
| 139 | 6  | 28 | 28 | 28 | S83L      |             |               |  |  |  |  | R1 | R1 | R1 | R1 | WT   |
| 140 | 6  | 6  | 6  | 6  | S83L/D87N | S80I/E84K   |               |  |  |  |  | R2 | R2 | R2 | R2 | WT   |
| 141 | 6  | 6  | 6  | 6  | S83L/D87N | S80I/E84K   |               |  |  |  |  | R2 | R2 | R2 | R2 | WT   |
| 142 | 6  | 6  | 6  | 7  | S83L/D87N | S80I/E84V   |               |  |  |  |  | R2 | R2 | R2 | R2 | WT   |
| 143 | 6  | 6  | 6  | 8  | S83L/D87N | S80I/E84V   | AAC(6')-Ib-cr |  |  |  |  | R2 | R2 | R2 | R2 | WT   |
| 144 | 6  | 6  | 6  | 9  | S83L/D87N | S80I/E84V   | AAC(6')-Ib-cr |  |  |  |  | R2 | R2 | R2 | R2 | ESBL |
| 145 | 6  | 14 | 6  | 19 | S83L/D87N | S80I        |               |  |  |  |  | R2 | R2 | R1 | R2 | WT   |
| 146 | 6  | 30 | 28 | 28 | S83L      |             |               |  |  |  |  | R1 | R1 | R1 | R1 | WT   |
| 147 | 6  | 8  | 6  | 11 | S83L/D87N | S80I        |               |  |  |  |  | R2 | R2 | R2 | R2 | WT   |
| 148 | 29 | 36 | 32 | 35 |           |             |               |  |  |  |  | WT | WT | WT | WT | WT   |
| 149 | 6  | 6  | 6  | 10 | S83L/D87N | <b>S80I</b> |               |  |  |  |  | R2 | R2 | R2 | R2 | WT   |
| 150 | 6  | 22 | 22 | 22 | S83L      |             |               |  |  |  |  | R1 | R1 | R1 | R1 | WT   |
| 151 | 6  | 9  | 6  | 16 | S83L/D87N | <b>S80I</b> |               |  |  |  |  | R2 | R2 | R2 | R2 | WT   |
| 152 | 27 | 33 | 31 | 32 |           |             |               |  |  |  |  | WT | WT | WT | WT | WT   |
| 153 | 6  | 24 | 26 | 25 | S83L      |             |               |  |  |  |  | R1 | R1 | R1 | R1 | ESBL |
| 154 | 6  | 9  | 6  | 13 | S83L/D87N | S80I        |               |  |  |  |  | R2 | R2 | R2 | R2 | ESBL |
| 155 | 23 | 33 | 31 | 31 |           |             |               |  |  |  |  | WT | WT | WT | WT | WT   |
| 156 | 30 | 40 | 36 | 37 |           |             |               |  |  |  |  | WT | WT | WT | WT | WT   |
| 157 | 6  | 27 | 29 | 28 | S83L      |             |               |  |  |  |  | R1 | R1 | R1 | R1 | WT   |
| 158 | 6  | 6  | 6  | 9  | S83L/D87N | S80I        | AAC(6')-Ib-cr |  |  |  |  | R2 | R2 | R2 | R2 | ESBL |
| 159 | 6  | 6  | 6  | 16 | S83L/D87N | <b>S80I</b> |               |  |  |  |  | R2 | R2 | R2 | R2 | WT   |
| 160 | 26 | 31 | 28 | 29 |           |             |               |  |  |  |  | WT | WT | WT | WT | WT   |
| 161 | 6  | 24 | 23 | 23 | S83L      |             |               |  |  |  |  | R1 | R1 | R1 | R1 | WT   |

|     |    |    |    |    |           |           |                      |      |  |  |  |    |    |    |    |      |
|-----|----|----|----|----|-----------|-----------|----------------------|------|--|--|--|----|----|----|----|------|
| 162 | 6  | 30 | 28 | 28 | S83L      |           |                      |      |  |  |  | R1 | R1 | R1 | R1 | WT   |
| 163 | 6  | 6  | 6  | 7  | S83L/D87N | S80I/E84V |                      |      |  |  |  | R2 | R2 | R2 | R2 | ESBL |
| 164 | 6  | 6  | 6  | 6  | S83L/D87N | S80I/E84G | AAC(6')-Ib           |      |  |  |  | R2 | R2 | R2 | R2 | WT   |
| 165 | 6  | 6  | 6  | 9  | S83L/D87N | S80I      |                      |      |  |  |  | R2 | R2 | R2 | R2 | WT   |
| 166 | 6  | 6  | 6  | 7  | S83L/D87N | S80I      |                      |      |  |  |  | R2 | R2 | R2 | R2 | WT   |
| 167 | 24 | 31 | 29 | 32 |           |           |                      |      |  |  |  | WT | WT | WT | WT | WT   |
| 168 | 26 | 35 | 34 | 35 |           |           |                      |      |  |  |  | WT | WT | WT | WT | WT   |
| 169 | 6  | 6  | 6  | 10 | S83L/D87N | S80I/E84V | AAC(6')-Ib-cr        |      |  |  |  | R2 | R2 | R2 | R2 | WT   |
| 170 | 26 | 31 | 33 | 30 |           |           |                      |      |  |  |  | WT | WT | WT | WT | WT   |
| 171 | 6  | 30 | 27 | 26 | S83L      |           |                      |      |  |  |  | R1 | R1 | R1 | R1 | ESBL |
| 172 | 23 | 34 | 34 | 31 |           |           |                      |      |  |  |  | WT | WT | WT | WT | WT   |
| 173 | 6  | 6  | 6  | 6  | S83L/D87N | S80I/E84V | AAC(6')-Ib-cr        |      |  |  |  | R2 | R2 | R2 | R2 | ESBL |
| 174 | 25 | 32 | 29 | 30 |           |           |                      |      |  |  |  | WT | WT | WT | WT | WT   |
| 175 | 26 | 34 | 30 | 33 |           |           |                      |      |  |  |  | WT | WT | WT | WT | WT   |
| 176 | 30 | 35 | 32 | 34 |           |           |                      |      |  |  |  | WT | WT | WT | WT | WT   |
| 177 | 24 | 37 | 36 | 36 |           |           |                      |      |  |  |  | WT | WT | WT | WT | WT   |
| 178 | 6  | 17 | 15 | 19 | S83L/D87N | S80I      |                      |      |  |  |  | R2 | R2 | R1 | R2 | WT   |
| 179 | 23 | 32 | 31 | 31 |           |           |                      |      |  |  |  | WT | WT | WT | WT | WT   |
| 180 | 25 | 37 | 32 | 34 |           |           |                      |      |  |  |  | WT | WT | WT | WT | WT   |
| 181 | 6  | 6  | 6  | 6  | S83L/D87N | S83L/D87N |                      | V84G |  |  |  | R2 | R2 | R2 | R2 | WT   |
| 182 | 29 | 35 | 33 | 35 |           |           |                      |      |  |  |  | WT | WT | WT | WT | WT   |
| 183 | 28 | 34 | 32 | 34 |           |           |                      |      |  |  |  | WT | WT | WT | WT | WT   |
| 184 | 14 | 30 | 29 | 27 |           |           | Qnr-B19              |      |  |  |  | R1 | R1 | R1 | R1 | ESBL |
| 185 | 6  | 6  | 6  | 12 | S83L/D87N | S80I/E84V | AAC(6')-Ib-cr        |      |  |  |  | R2 | R2 | R2 | R2 | WT   |
| 186 | 6  | 27 | 26 | 27 | S83L      |           |                      |      |  |  |  | R1 | R1 | R1 | R1 | WT   |
| 187 | 6  | 6  | 6  | 10 | S83L/D87N | S80I/E84V |                      |      |  |  |  | R2 | R2 | R2 | R2 | WT   |
| 188 | 6  | 6  | 6  | 8  | S83L/D87Y | S80I/E84G |                      |      |  |  |  | R2 | R2 | R2 | R2 | ESBL |
| 189 | 6  | 14 | 12 | 16 | S83L/D87N | S80I      |                      |      |  |  |  | R2 | R2 | R2 | R2 | WT   |
| 190 | 6  | 6  | 6  | 6  | S83L/D87N | S80I/E84G | AAC(6')-Ib/<br>OqxAB |      |  |  |  | R2 | R2 | R2 | R2 | ESBL |
| 191 | 6  | 15 | 10 | 15 | S83L/D87Y | S80I      |                      |      |  |  |  | R2 | R2 | R2 | R2 | WT   |
| 192 | 6  | 31 | 28 | 29 | S83L      |           |                      |      |  |  |  | R1 | R1 | R1 | R1 | WT   |
| 193 | 6  | 17 | 13 | 17 | S83L/D87N | S80I      |                      |      |  |  |  | R2 | R2 | R2 | R2 | WT   |
| 194 | 6  | 6  | 6  | 6  | S83L/D87N | S80I/E84V | AAC(6')-Ib-cr        |      |  |  |  | R2 | R2 | R2 | R2 | WT   |

|     |    |    |    |    |           |           |               |  |  |  |  |    |    |    |    |      |
|-----|----|----|----|----|-----------|-----------|---------------|--|--|--|--|----|----|----|----|------|
| 195 | 24 | 30 | 26 | 28 |           |           |               |  |  |  |  | WT | WT | WT | WT | WT   |
| 196 | 26 | 36 | 34 | 34 |           |           |               |  |  |  |  | WT | WT | WT | WT | WT   |
| 197 | 26 | 38 | 36 | 36 |           |           |               |  |  |  |  | WT | WT | WT | WT | ESBL |
| 198 | 6  | 6  | 6  | 9  | S83L/D87N | S80I      |               |  |  |  |  | R2 | R2 | R2 | R2 | WT   |
| 199 | 25 | 33 | 33 | 33 |           |           |               |  |  |  |  | WT | WT | WT | WT | WT   |
| 200 | 27 | 35 | 34 | 34 |           |           |               |  |  |  |  | WT | WT | WT | WT | WT   |
| 201 | 6  | 6  | 6  | 6  | S83L/D87Y | S80I/E84G |               |  |  |  |  | R2 | R2 | R2 | R2 | ESBL |
| 202 | 26 | 34 | 33 | 32 |           |           |               |  |  |  |  | WT | WT | WT | WT | WT   |
| 203 | 6  | 6  | 6  | 9  | S83L/D87N | S80I      |               |  |  |  |  | R2 | R2 | R2 | R2 | WT   |
| 204 | 6  | 6  | 6  | 6  | S83L/D87Y | S80I/E84G |               |  |  |  |  | R2 | R2 | R2 | R2 | WT   |
| 205 | 6  | 6  | 6  | 8  | S83L/D87N | S80I      | AAC(6')-Ib-cr |  |  |  |  | R2 | R2 | R2 | R2 | WT   |
| 206 | 6  | 6  | 7  | 7  | S83L/D87N | S80I      | AAC(6')-Ib-cr |  |  |  |  | R2 | R2 | R2 | R2 | WT   |
| 207 | 6  | 6  | 6  | 10 | S83L/D87N | S80I/E84V |               |  |  |  |  | R2 | R2 | R2 | R2 | ESBL |
| 208 | 6  | 6  | 6  | 9  | S83L/D87Y | S80I/E84V | AAC(6')-Ib-cr |  |  |  |  | R2 | R2 | R2 | R2 | WT   |
| 209 | 6  | 6  | 6  | 8  | S83L/D87Y | S80I/E84G |               |  |  |  |  | R2 | R2 | R2 | R2 | WT   |
| 210 | 22 | 37 | 34 | 33 |           |           |               |  |  |  |  | WT | WT | WT | WT | WT   |
| 211 | 6  | 6  | 6  | 8  | S83L/D87N | S80I/E84V | AAC(6')-Ib-cr |  |  |  |  | R2 | R2 | R2 | R2 | ESBL |
| 212 | 6  | 6  | 6  | 12 | S83L/D87N | S80I      |               |  |  |  |  | R2 | R2 | R2 | R2 | WT   |
| 213 | 6  | 6  | 6  | 6  | S83L/D87N | S80I      | Qnr-B4        |  |  |  |  | R2 | R2 | R2 | R2 | ESBL |
| 214 | 6  | 22 | 25 | 22 |           |           | Qnr-S1        |  |  |  |  | R1 | R1 | R1 | R1 | WT   |
| 215 | 6  | 23 | 27 | 23 |           |           | Qnr-S2        |  |  |  |  | R1 | R1 | R1 | R1 | WT   |
| 216 | 6  | 6  | 6  | 11 | S83L/D87N | S80I/E84V |               |  |  |  |  | R2 | R2 | R2 | R2 | ESBL |
| 217 | 23 | 28 | 30 | 25 |           |           |               |  |  |  |  | WT | WT | WT | WT | WT   |
| 218 | 6  | 20 | 24 | 19 | S83L      |           | Qnr-S1        |  |  |  |  | R1 | R1 | R1 | R1 | ESBL |
| 219 | 6  | 6  | 6  | 9  | S83L/D87N | S80I      | AAC(6')-Ib-cr |  |  |  |  | R2 | R2 | R2 | R2 | ESBL |
| 220 | 28 | 32 | 29 | 32 |           |           |               |  |  |  |  | WT | WT | WT | WT | WT   |
| 221 | 22 | 28 | 27 | 27 |           |           |               |  |  |  |  | WT | WT | WT | WT | WT   |
| 222 | 6  | 6  | 6  | 9  | S83L/D87N | S80I      | AAC(6')-Ib-cr |  |  |  |  | R2 | R2 | R2 | R2 | WT   |
| 223 | 25 | 31 | 30 | 31 |           |           |               |  |  |  |  | WT | WT | WT | WT | WT   |
| 224 | 6  | 6  | 6  | 6  | S83L/D87N | S80I/E84V | AAC(6')-Ib-cr |  |  |  |  | R2 | R2 | R2 | R2 | ESBL |
| 225 | 6  | 14 | 14 | 17 | S83L/D87N | S80I      |               |  |  |  |  | R2 | R2 | R2 | R2 | WT   |
| 226 | 26 | 32 | 28 | 29 |           |           |               |  |  |  |  | WT | WT | WT | WT | WT   |
| 227 | 6  | 26 | 25 | 27 | S83L      |           |               |  |  |  |  | R1 | R1 | R1 | R1 | WT   |

|     |    |    |    |    |           |           |               |  |  |  |  |    |    |    |    |      |
|-----|----|----|----|----|-----------|-----------|---------------|--|--|--|--|----|----|----|----|------|
| 228 | 6  | 6  | 6  | 6  | S83L/D87N | S80I      | AAC(6')-Ib-cr |  |  |  |  | R2 | R2 | R2 | R2 | ESBL |
| 229 | 6  | 6  | 6  | 6  | S83L/D87N | S80I      | AAC(6')-Ib-cr |  |  |  |  | R2 | R2 | R2 | R2 | ESBL |
| 230 | 6  | 6  | 6  | 6  | S83L/D87N | S80I/E84V | AAC(6')-Ib-cr |  |  |  |  | R2 | R2 | R2 | R2 | ESBL |
| 231 | 22 | 26 | 24 | 24 |           |           |               |  |  |  |  | WT | WT | WT | WT | WT   |
| 232 | 6  | 6  | 6  | 6  | S83L/D87N | S80I      |               |  |  |  |  | R2 | R2 | R2 | R2 | WT   |
| 233 | 6  | 6  | 6  | 11 | S83L/D87N | S80I/E84V | AAC(6')-Ib-cr |  |  |  |  | R2 | R2 | R2 | R2 | ESBL |
| 234 | 7  | 21 | 22 | 19 | D87N      |           | Qnr-S1        |  |  |  |  | R1 | R1 | R1 | R1 | WT   |
| 235 | 6  | 11 | 6  | 15 | S83L/D87N | S80I      |               |  |  |  |  | R2 | R2 | R2 | R2 | WT   |
| 236 | 23 | 30 | 28 | 30 |           |           |               |  |  |  |  | WT | WT | WT | WT | WT   |
| 237 | 7  | 30 | 28 | 28 | D87Y      |           |               |  |  |  |  | R1 | R1 | R1 | R1 | WT   |
| 238 | 6  | 26 | 23 | 26 | S83L      |           |               |  |  |  |  | R1 | R1 | R1 | R1 | WT   |
| 239 | 6  | 6  | 6  | 10 | S83L/D87N | S80I      | AAC(6')-Ib-cr |  |  |  |  | R2 | R2 | R2 | R2 | WT   |
| 240 | 6  | 6  | 6  | 6  | S83L/D87N | S80I      |               |  |  |  |  | R2 | R2 | R2 | R2 | WT   |
| 241 | 6  | 6  | 6  | 10 | S83L/D87N | S80I      | AAC(6')-Ib-cr |  |  |  |  | R2 | R2 | R2 | R2 | WT   |
| 242 | 19 | 27 | 26 | 26 |           |           |               |  |  |  |  | WT | WT | WT | WT | WT   |
| 243 | 21 | 24 | 24 | 25 |           |           | Qnr-S1        |  |  |  |  | WT | WT | WT | R1 | WT   |
| 244 | 6  | 6  | 6  | 6  | S83L/D87Y | S80I/E84V | AAC(6')-Ib-cr |  |  |  |  | R2 | R2 | R2 | R2 | WT   |
| 245 | 25 | 35 | 32 | 32 |           |           |               |  |  |  |  | WT | WT | WT | WT | WT   |
| 246 | 6  | 27 | 26 | 28 | S83L      |           |               |  |  |  |  | R1 | R1 | R1 | R1 | WT   |
| 247 | 30 | 38 | 35 | 34 |           |           |               |  |  |  |  | WT | WT | WT | WT | WT   |
| 248 | 6  | 6  | 6  | 11 | S83L/D87Y | S80I/E84V | AAC(6')-Ib-cr |  |  |  |  | R2 | R2 | R2 | R2 | WT   |
| 249 | 6  | 12 | 11 | 8  | S83L/D87N | S80I      |               |  |  |  |  | R2 | R2 | R2 | R2 | WT   |
| 250 | 6  | 12 | 6  | 13 | S83L/D87N | S80I      |               |  |  |  |  | R2 | R2 | R2 | R2 | WT   |
| 251 | 21 | 29 | 27 | 26 |           |           |               |  |  |  |  | WT | WT | WT | WT | WT   |
| 252 | 10 | 23 | 22 | 22 |           |           | Qnr-S1        |  |  |  |  | R1 | R1 | R1 | R1 | WT   |
| 253 | 6  | 6  | 6  | 11 | S83L/D87N | S80I/E84V | AAC(6')-Ib-cr |  |  |  |  | R2 | R2 | R2 | R2 | ESBL |
| 254 | 6  | 31 | 29 | 29 | S83L      |           |               |  |  |  |  | R1 | R1 | R1 | R1 | WT   |
| 255 | 6  | 6  | 6  | 8  | S83L/D87Y | S80I/E84G |               |  |  |  |  | R2 | R2 | R2 | R2 | ESBL |
| 256 | 6  | 12 | 13 | 13 | S83L/D87N | S80I      |               |  |  |  |  | R2 | R2 | R2 | R2 | WT   |
| 257 | 6  | 6  | 6  | 6  | S83L/D87N | S80I      |               |  |  |  |  | R2 | R2 | R2 | R2 | ESBL |
| 258 | 21 | 36 | 34 | 36 |           |           |               |  |  |  |  | WT | WT | WT | WT | WT   |
| 259 | 6  | 25 | 25 | 25 | S83L      |           |               |  |  |  |  | R1 | R1 | R1 | R1 | WT   |
| 260 | 6  | 24 | 22 | 23 | S83L      |           |               |  |  |  |  | R1 | R1 | R1 | R1 | WT   |

|     |    |    |    |    |           |           |               |                 |  |  |  |    |    |    |    |      |
|-----|----|----|----|----|-----------|-----------|---------------|-----------------|--|--|--|----|----|----|----|------|
| 261 | 6  | 23 | 23 | 23 | S83L/D87A |           |               |                 |  |  |  | R1 | R1 | R1 | R1 | WT   |
| 262 | 24 | 30 | 30 | 28 |           |           |               |                 |  |  |  | WT | WT | WT | WT | WT   |
| 263 | 6  | 6  | 6  | 9  | S83L/D87N | S80I/E84V |               |                 |  |  |  | R2 | R2 | R2 | R2 | ESBL |
| 264 | 27 | 30 | 29 | 31 |           |           |               |                 |  |  |  | WT | WT | WT | WT | WT   |
| 265 | 6  | 6  | 6  | 8  | S83L/D87Y | S80I/E84G |               |                 |  |  |  | R2 | R2 | R2 | R2 | WT   |
| 266 | 6  | 6  | 6  | 9  | S83L/D87Y | S80I/E84V |               |                 |  |  |  | R2 | R2 | R2 | R2 | WT   |
| 267 | 6  | 13 | 12 | 13 | S83L/D87N | S80I      |               |                 |  |  |  | R2 | R2 | R2 | R2 | WT   |
| 268 | 6  | 6  | 6  | 6  | S83L/D87N | G78D      | GyrB E466D    | G103S,<br>Y137H |  |  |  | R2 | R2 | R2 | R2 | WT   |
| 269 | 27 | 33 | 32 | 32 |           |           |               |                 |  |  |  | WT | WT | WT | WT | WT   |
| 270 | 6  | 6  | 6  | 9  | S83L/D87N | S80I/E84V | AAC(6')-Ib-cr |                 |  |  |  | R2 | R2 | R2 | R2 | ESBL |
| 271 | 6  | 6  | 6  | 9  | S83L/D87Y | S80I/E84G |               |                 |  |  |  | R2 | R2 | R2 | R2 | WT   |
| 272 | 6  | 13 | 11 | 16 | S83L/D87N | S80I      |               |                 |  |  |  | R2 | R2 | R2 | R2 | WT   |
| 273 | 6  | 6  | 6  | 9  | S83L/D87N | S80I      | Qnr-S1        |                 |  |  |  | R2 | R2 | R2 | R2 | WT   |
| 274 | 28 | 37 | 32 | 33 |           |           |               |                 |  |  |  | WT | WT | WT | WT | WT   |
| 275 | 6  | 27 | 20 | 26 | S83L      |           |               |                 |  |  |  | R1 | R1 | R1 | R1 | ESBL |
| 276 | 6  | 27 | 20 | 26 | S83L      |           |               |                 |  |  |  | R1 | R1 | R1 | R1 | ESBL |
| 277 | 6  | 6  | 6  | 6  | S83L/D87N | S80I/E84V |               |                 |  |  |  | R2 | R2 | R2 | R2 | WT   |
| 278 | 6  | 6  | 6  | 11 | S83L/D87N | S80I/E84V |               |                 |  |  |  | R2 | R2 | R2 | R2 | WT   |
| 279 | 6  | 6  | 6  | 9  | S83L/D87N | S80I/E84V | AAC(6')-Ib-cr |                 |  |  |  | R2 | R2 | R2 | R2 | ESBL |
| 280 | 6  | 16 | 15 | 18 | S83L/D87N | S80I      |               |                 |  |  |  | R2 | R2 | R1 | R2 | WT   |
| 281 | 6  | 6  | 6  | 6  | S83L/D87N | S80I/E84V | AAC(6')-Ib-cr |                 |  |  |  | R2 | R2 | R2 | R2 | WT   |
| 282 | 23 | 32 | 29 | 31 |           |           |               |                 |  |  |  | WT | WT | WT | WT | WT   |
| 283 | 6  | 6  | 6  | 9  | S83L/D87N | S80I      |               |                 |  |  |  | R2 | R2 | R2 | R2 | WT   |
| 284 | 28 | 40 | 40 | 40 |           |           |               |                 |  |  |  | WT | WT | WT | WT | WT   |
| 285 | 6  | 6  | 6  | 6  | S83L/D87N | S80I      | Qnr-S1        |                 |  |  |  | R2 | R2 | R2 | R2 | WT   |
| 286 | 6  | 6  | 6  | 6  | S83L/D87N | S80I      | AAC(6')-Ib-cr |                 |  |  |  | R2 | R2 | R2 | R2 | WT   |
| 287 | 6  | 6  | 6  | 8  | S83L/D87N | S80I      |               |                 |  |  |  | R2 | R2 | R2 | R2 | WT   |
| 288 | 9  | 11 | 9  | 12 | S83L/D87N | E84K      |               |                 |  |  |  | R2 | R2 | R2 | R2 | WT   |
| 289 | 29 | 35 | 31 | 31 |           |           |               |                 |  |  |  | WT | WT | WT | WT | WT   |
| 290 | 6  | 30 | 29 | 27 | S83L      |           |               |                 |  |  |  | R1 | R1 | R1 | R1 | WT   |
| 291 | 24 | 38 | 36 | 34 |           |           |               |                 |  |  |  | WT | WT | WT | WT | WT   |
| 292 | 6  | 11 | 10 | 12 | S83L/D87N | S80I      |               |                 |  |  |  | R2 | R2 | R2 | R2 | WT   |
| 293 | 23 | 32 | 30 | 32 |           |           |               |                 |  |  |  | WT | WT | WT | WT | WT   |

|     |    |    |    |    |           |           |               |              |  |  |  |    |    |    |    |       |
|-----|----|----|----|----|-----------|-----------|---------------|--------------|--|--|--|----|----|----|----|-------|
| 294 | 28 | 34 | 34 | 31 |           |           |               |              |  |  |  | WT | WT | WT | WT | WT    |
| 295 | 6  | 26 | 23 | 26 | S83L      | S80R      |               |              |  |  |  | R1 | R1 | R1 | R1 | WT    |
| 296 | 6  | 6  | 6  | 9  | S83L/D87N | S80I      | AAC(6')-Ib-cr |              |  |  |  | R2 | R2 | R2 | R2 | ESBL  |
| 297 | 22 | 29 | 26 | 28 |           |           |               |              |  |  |  | WT | WT | WT | WT | WT    |
| 298 | 6  | 6  | 6  | 9  | S83L/D87N | S80I/E84V |               |              |  |  |  | R2 | R2 | R2 | R2 | WT    |
| 299 | 6  | 6  | 6  | 9  | S83L/D87N | S80I      |               |              |  |  |  | R2 | R2 | R2 | R2 | WT    |
| 300 | 23 | 33 | 29 | 30 |           |           |               |              |  |  |  | WT | WT | WT | WT | WT    |
| 301 | 23 | 32 | 30 | 32 |           |           |               |              |  |  |  | WT | WT | WT | WT | WT    |
| 302 | 26 | 34 | 36 | 36 |           |           |               |              |  |  |  | WT | WT | WT | WT | WT    |
| 303 | 6  | 16 | 18 | 15 | S83L      |           | Qnr-S1        |              |  |  |  | R2 | R1 | R2 | R1 | WT    |
| 304 | 6  | 6  | 6  | 11 | S83L/D87N | S80I/E84V |               |              |  |  |  | R2 | R2 | R2 | R2 | ESBL  |
| 305 | 29 | 32 | 34 | 31 |           |           |               |              |  |  |  | WT | WT | WT | WT | WT    |
| 306 | 6  | 14 | 11 | 16 | S83L/D87N | S80I      |               |              |  |  |  | R2 | R2 | R2 | R2 | WT    |
| 307 | 6  | 6  | 6  | 9  | S83L/D87N | S80I/E84V |               |              |  |  |  | R2 | R2 | R2 | R2 | ESBL  |
| 308 | 6  | 22 | 22 | 22 | S83L      |           |               |              |  |  |  | R1 | R1 | R1 | R1 | WT    |
| 309 | 6  | 6  | 6  | 6  | S83L/D87N | S80I/E84V |               |              |  |  |  | R2 | R2 | R2 | R2 | ESBL  |
| 310 | 6  | 6  | 6  | 11 | S83L/D87N | S80I/E84V |               |              |  |  |  | R2 | R2 | R2 | R2 | ESBL  |
| 311 | 6  | 6  | 6  | 10 | S83L/D87N | S80I/E84V |               |              |  |  |  | R2 | R2 | R2 | R2 | ESBL  |
| 312 | 6  | 6  | 6  | 9  | S83L/D87N | S80I/E84G |               | G103S, Y137H |  |  |  | R2 | R2 | R2 | R2 | Carba |
| 313 | 6  | 6  | 6  | 13 | S83L/D87N | S80I/E84V | AAC(6')-Ib-cr |              |  |  |  | R2 | R2 | R2 | R2 | ESBL  |
| 314 | 6  | 6  | 6  | 6  | S83L/D87N | S80I      |               |              |  |  |  | R2 | R2 | R2 | R2 | ESBL  |
| 315 | 6  | 31 | 29 | 31 | S83L      |           |               |              |  |  |  | R1 | R1 | R1 | R1 | WT    |
| 316 | 6  | 6  | 6  | 14 | S83L/D87N | S80I/E84V | AAC(6')-Ib-cr |              |  |  |  | R2 | R2 | R2 | R2 | ESBL  |
| 317 | 6  | 6  | 6  | 12 | S83L/D87N | S80I/E84V |               |              |  |  |  | R2 | R2 | R2 | R2 | AmpC  |
| 318 | 27 | 39 | 32 | 35 |           |           |               |              |  |  |  | WT | WT | WT | WT | WT    |
| 319 | 6  | 20 | 17 | 21 | S83L      |           |               |              |  |  |  | R1 | R2 | R1 | R1 | WT    |
| 320 | 6  | 26 | 24 | 26 | S83L      |           |               |              |  |  |  | R1 | R1 | R1 | R1 | ESBL  |
| 321 | 6  | 38 | 22 | 36 | S83L      |           |               |              |  |  |  | R1 | R1 | R1 | R1 | WT    |
| 322 | 6  | 18 | 20 | 17 | S83L/D87Y |           |               |              |  |  |  | R1 | R1 | R2 | R1 | WT    |
| 323 | 6  | 18 | 18 | 17 | S83L      | S80I      |               |              |  |  |  | R1 | R1 | R2 | R1 | WT    |
| 324 | 6  | 6  | 6  | 8  | S83L/D87N | S80I      |               |              |  |  |  | R2 | R2 | R2 | R2 | WT    |
| 325 | 29 | 37 | 34 | 36 |           |           |               |              |  |  |  | WT | WT | WT | WT | ESBL  |
| 326 | 6  | 6  | 6  | 12 | S83L/D87N | S80I/E84V |               |              |  |  |  | R2 | R2 | R2 | R2 | WT    |

|     |    |    |    |    |           |           |               |            |  |  |  |    |    |    |    |      |
|-----|----|----|----|----|-----------|-----------|---------------|------------|--|--|--|----|----|----|----|------|
| 327 | 6  | 6  | 6  | 10 | S83L/D87N | S80I      |               |            |  |  |  | R2 | R2 | R2 | R2 | WT   |
| 328 | 6  | 6  | 6  | 10 | S83L/D87N | S80I/E84G |               |            |  |  |  | R2 | R2 | R2 | R2 | WT   |
| 329 | 26 | 31 | 30 | 29 |           |           |               |            |  |  |  | WT | WT | WT | WT | ESBL |
| 330 | 28 | 37 | 32 | 34 |           |           |               |            |  |  |  | WT | WT | WT | WT | WT   |
| 331 | 25 | 28 | 26 | 27 |           |           |               |            |  |  |  | WT | WT | WT | WT | WT   |
| 332 | 6  | 6  | 6  | 12 | S83L/D87N | S80I/E84V |               |            |  |  |  | R2 | R2 | R2 | R2 | WT   |
| 333 | 26 | 33 | 29 | 30 |           |           |               |            |  |  |  | WT | WT | WT | WT | WT   |
| 334 | 6  | 6  | 6  | 8  | S83L/D87N | S80I/E84V | AAC(6')-Ib-cr |            |  |  |  | R2 | R2 | R2 | R2 | WT   |
| 335 | 6  | 18 | 14 | 20 | S83W      | S80I      |               |            |  |  |  | R1 | R2 | R1 | R1 | WT   |
| 336 | 6  | 25 | 24 | 26 | S83L      |           |               |            |  |  |  | R1 | R1 | R1 | R1 | WT   |
| 337 | 6  | 6  | 6  | 12 | S83L/D87N | S80I      |               | D aa 51-63 |  |  |  | R2 | R2 | R2 | R2 | WT   |
| 338 | 24 | 34 | 33 | 32 |           |           |               |            |  |  |  | WT | WT | WT | WT | WT   |
| 339 | 24 | 35 | 33 | 34 |           |           |               |            |  |  |  | WT | WT | WT | WT | WT   |
| 340 | 6  | 6  | 6  | 11 | S83L/D87N | S80I      | AAC(6')-Ib-cr |            |  |  |  | R2 | R2 | R2 | R2 | ESBL |
| 341 | 27 | 31 | 29 | 30 |           |           |               |            |  |  |  | WT | WT | WT | WT | WT   |
| 342 | 6  | 6  | 6  | 7  | S83L/D87Y | S80I/E84G |               |            |  |  |  | R2 | R2 | R2 | R2 | WT   |
| 343 | 6  | 9  | 6  | 12 | S83L/D87N | S80I      |               |            |  |  |  | R2 | R2 | R2 | R2 | WT   |
| 344 | 22 | 38 | 35 | 36 |           |           | AAC(6')-Ib-cr |            |  |  |  | WT | WT | WT | R1 | WT   |
| 345 | 6  | 30 | 28 | 28 | S83L      |           |               |            |  |  |  | R1 | R1 | R1 | R1 | WT   |
| 346 | 6  | 23 | 22 | 23 | S83L      |           |               |            |  |  |  | R1 | R1 | R1 | R1 | WT   |
| 347 | 6  | 6  | 6  | 6  | S83L/D87Y | S80I/E84V | AAC(6')-Ib-cr |            |  |  |  | R2 | R2 | R2 | R2 | WT   |
| 348 | 6  | 6  | 6  | 6  | S83L/D87N | S80I/E84K |               |            |  |  |  | R2 | R2 | R2 | R2 | WT   |
| 349 | 6  | 21 | 20 | 21 | S83L      |           |               |            |  |  |  | R1 | R1 | R1 | R1 | WT   |
| 350 | 6  | 6  | 6  | 9  | S83L/D87N | S80I/E84V |               |            |  |  |  | R2 | R2 | R2 | R2 | WT   |
| 351 | 23 | 27 | 27 | 25 |           |           |               |            |  |  |  | WT | WT | WT | WT | WT   |
| 352 | 22 | 33 | 31 | 32 |           |           |               |            |  |  |  | WT | WT | WT | WT | WT   |
| 353 | 6  | 6  | 6  | 6  | S83L/D87N | S80I      |               |            |  |  |  | R2 | R2 | R2 | R2 | ESBL |
| 354 | 28 | 33 | 29 | 30 |           |           |               |            |  |  |  | WT | WT | WT | WT | WT   |
| 355 | 26 | 36 | 35 | 33 |           |           |               |            |  |  |  | WT | WT | WT | WT | WT   |
| 356 | 6  | 6  | 6  | 8  | S83L/D87N | S80I/E84V |               |            |  |  |  | R2 | R2 | R2 | R2 | ESBL |
| 357 | 6  | 6  | 6  | 8  | S83L/D87N | S80I/E84V |               |            |  |  |  | R2 | R2 | R2 | R2 | WT   |
| 358 | 6  | 6  | 6  | 6  | S83L/D87Y | S80I      | OqxAB         |            |  |  |  | R2 | R2 | R2 | R2 | ESBL |
| 359 | 6  | 12 | 14 | 17 | S83L/D87N | S80I      |               |            |  |  |  | R2 | R2 | R2 | R2 | WT   |

|     |    |    |    |    |           |           |               |  |  |  |  |    |    |    |    |           |
|-----|----|----|----|----|-----------|-----------|---------------|--|--|--|--|----|----|----|----|-----------|
| 360 | 10 | 19 | 21 | 17 | S83L/D87Y | S80R      | OqxAB         |  |  |  |  | R1 | R1 | R2 | R2 | WT        |
| 361 | 6  | 13 | 12 | 14 | S83L/D87N | S80I      |               |  |  |  |  | R2 | R2 | R2 | R2 | WT        |
| 362 | 6  | 12 | 12 | 13 | S83L/D87N | S80I      |               |  |  |  |  | R2 | R2 | R2 | R2 | WT        |
| 363 | 6  | 6  | 6  | 11 | S83L/D87N | S80I/E84V |               |  |  |  |  | R2 | R2 | R2 | R2 | WT        |
| 364 | 24 | 30 | 26 | 27 |           |           |               |  |  |  |  | WT | WT | WT | WT | WT        |
| 365 | 6  | 24 | 22 | 23 | S83L      |           |               |  |  |  |  | R1 | R1 | R1 | R1 | WT        |
| 366 | 6  | 6  | 6  | 6  | S83L/D87N | S80I      |               |  |  |  |  | R2 | R2 | R2 | R2 | WT        |
| 367 | 6  | 6  | 6  | 6  | S83L/D87N | S80I      |               |  |  |  |  | R2 | R2 | R2 | R2 | WT        |
| 368 | 6  | 6  | 6  | 6  | S83L/D87N | S80I      |               |  |  |  |  | R2 | R2 | R2 | R2 | WT        |
| 369 | 28 | 32 | 32 | 30 |           |           |               |  |  |  |  | WT | WT | WT | WT | WT        |
| 370 | 6  | 6  | 6  | 16 | S83L/D87N | S80I/E84G |               |  |  |  |  | R2 | R2 | R2 | R2 | WT        |
| 371 | 6  | 6  | 6  | 10 | S83L/D87N | S80I/E84V |               |  |  |  |  | R2 | R2 | R2 | R2 | WT        |
| 372 | 6  | 6  | 6  | 10 | S83L/D87N | S80I/E84V |               |  |  |  |  | R2 | R2 | R2 | R2 | WT        |
| 373 | 6  | 18 | 16 | 16 | S83L      |           | Qnr-A1        |  |  |  |  | R1 | R2 | R2 | R1 | ESBL      |
| 374 | 23 | 30 | 28 | 28 |           |           |               |  |  |  |  | WT | WT | WT | WT | WT        |
| 375 | 6  | 23 | 19 | 23 | S83L      |           |               |  |  |  |  | R1 | R1 | R1 | R1 | WT        |
| 376 | 6  | 23 | 19 | 24 | S83L      |           |               |  |  |  |  | R1 | R1 | R1 | R1 | WT        |
| 377 | 6  | 23 | 20 | 22 | S83L      |           |               |  |  |  |  | R1 | R1 | R1 | R1 | WT        |
| 378 | 6  | 23 | 19 | 23 | S83L      |           |               |  |  |  |  | R1 | R1 | R1 | R1 | WT        |
| 379 | 6  | 22 | 19 | 21 | S83L      |           |               |  |  |  |  | R1 | R1 | R1 | R1 | WT        |
| 380 | 26 | 37 | 35 | 34 |           |           |               |  |  |  |  | WT | WT | WT | WT | WT        |
| 381 | 6  | 6  | 6  | 6  | S83L/D87N | S80I/E84G |               |  |  |  |  | R2 | R2 | R2 | R2 | WT        |
| 382 | 24 | 34 | 33 | 32 |           |           |               |  |  |  |  | WT | WT | WT | WT | WT        |
| 383 | 26 | 31 | 35 | 33 |           |           |               |  |  |  |  | WT | WT | WT | WT | WT        |
| 384 | 6  | 6  | 6  | 6  | S83L/D87N | S80I      |               |  |  |  |  | R2 | R2 | R2 | R2 | AmpC/ESBL |
| 385 | 28 | 38 | 36 | 36 |           |           |               |  |  |  |  | WT | WT | WT | WT | WT        |
| 386 | 25 | 29 | 30 | 29 |           |           |               |  |  |  |  | WT | WT | WT | WT | WT        |
| 387 | 26 | 32 | 30 | 28 |           |           |               |  |  |  |  | WT | WT | WT | WT | WT        |
| 388 | 6  | 23 | 6  | 23 | S83L/D87N | S80I      | AAC(6')-Ib-cr |  |  |  |  | R1 | R2 | R1 | R2 | ESBL      |
| 389 | 6  | 9  | 6  | 13 | S83L/D87N | S80I      |               |  |  |  |  | R2 | R2 | R2 | R2 | WT        |
| 390 | 6  | 24 | 16 | 24 | A84P/D87G | S80I      |               |  |  |  |  | R1 | R2 | R1 | R2 | WT        |
| 391 | 27 | 38 | 35 | 36 |           |           |               |  |  |  |  | WT | WT | WT | WT | WT        |
| 392 | 6  | 27 | 29 | 28 | D87N      |           |               |  |  |  |  | R1 | R1 | R1 | R1 | WT        |

|     |    |    |    |    |           |           |               |  |  |  |  |    |    |    |    |           |
|-----|----|----|----|----|-----------|-----------|---------------|--|--|--|--|----|----|----|----|-----------|
| 393 | 6  | 15 | 15 | 16 | S83L/D87N | S80R      |               |  |  |  |  | R2 | R2 | R2 | R2 | WT        |
| 394 | 6  | 6  | 6  | 11 | S83L/D87N | S80I/E84V | AAC(6')-Ib-cr |  |  |  |  | R2 | R2 | R2 | R2 | WT        |
| 395 | 6  | 6  | 6  | 10 | S83L/D87N | S80I      |               |  |  |  |  | R2 | R2 | R2 | R2 | WT        |
| 396 | 6  | 11 | 6  | 11 | S83L/D87N | S80I      |               |  |  |  |  | R2 | R2 | R2 | R2 | WT        |
| 397 | 6  | 11 | 11 | 11 | S83L/D87N | S80I      |               |  |  |  |  | R2 | R2 | R2 | R2 | WT        |
| 398 | 6  | 6  | 6  | 7  | S83L/D87N | S80I      |               |  |  |  |  | R2 | R2 | R2 | R2 | AmpC/ESBL |
| 399 | 6  | 6  | 6  | 10 | S83L/D87N | S80I      |               |  |  |  |  | R2 | R2 | R2 | R2 | WT        |
| 400 | 6  | 6  | 6  | 6  | S83L/D87N | S80I/E84V |               |  |  |  |  | R2 | R2 | R2 | R2 | ESBL      |
| 401 | 10 | 32 | 31 | 30 | D87Y      |           |               |  |  |  |  | R1 | R1 | R1 | R1 | WT        |
| 402 | 6  | 24 | 24 | 24 | S83L      |           |               |  |  |  |  | R1 | R1 | R1 | R1 | WT        |
| 403 | 24 | 35 | 33 | 34 |           |           |               |  |  |  |  | WT | WT | WT | WT | WT        |
| 404 | 21 | 34 | 31 | 31 |           |           |               |  |  |  |  | WT | WT | WT | WT | WT        |
| 405 | 26 | 38 | 34 | 34 |           |           |               |  |  |  |  | WT | WT | WT | WT | WT        |
| 406 | 6  | 6  | 6  | 12 | S83L/D87N | S80I      |               |  |  |  |  | R2 | R2 | R2 | R2 | WT        |
| 407 | 6  | 6  | 6  | 10 | S83L/D87N | S80I      |               |  |  |  |  | R2 | R2 | R2 | R2 | WT        |
| 408 | 6  | 8  | 6  | 8  | S83L/D87N | S80I      | Qnr-S2        |  |  |  |  | R2 | R2 | R2 | R2 | WT        |
| 409 | 26 | 34 | 33 | 33 |           |           |               |  |  |  |  | WT | WT | WT | WT | WT        |
| 410 | 6  | 6  | 6  | 10 | S83L/D87N | S80I/E84V | AAC(6')-Ib-cr |  |  |  |  | R2 | R2 | R2 | R2 | ESBL      |
| 411 | 6  | 25 | 23 | 24 | S83L      |           |               |  |  |  |  | R1 | R1 | R1 | R1 | WT        |
| 412 | 6  | 7  | 6  | 10 | S83L/D87N | S80I/E84A |               |  |  |  |  | R2 | R2 | R2 | R2 | WT        |
| 413 | 6  | 29 | 29 | 30 | S83L      |           |               |  |  |  |  | R1 | R1 | R1 | R1 | ESBL      |
| 414 | 6  | 32 | 27 | 30 | S83L      |           |               |  |  |  |  | R1 | R1 | R1 | R1 | WT        |
| 415 | 22 | 27 | 29 | 26 |           |           |               |  |  |  |  | WT | WT | WT | WT | ESBL      |
| 416 | 6  | 7  | 6  | 11 | S83L/D87N | S80I      |               |  |  |  |  | R2 | R2 | R2 | R2 | WT        |
| 417 | 6  | 23 | 25 | 23 | S83L      | E84G      |               |  |  |  |  | R1 | R1 | R1 | R1 | WT        |
| 418 | 25 | 38 | 32 | 37 |           |           |               |  |  |  |  | WT | WT | WT | WT | WT        |
| 419 | 6  | 6  | 6  | 9  | S83L/D87Y | S80I/E84V |               |  |  |  |  | R2 | R2 | R2 | R2 | WT        |
| 420 | 25 | 36 | 33 | 34 |           |           |               |  |  |  |  | WT | WT | WT | WT | WT        |
| 421 | 26 | 37 | 30 | 33 |           |           |               |  |  |  |  | WT | WT | WT | WT | WT        |
| 422 | 6  | 6  | 6  | 9  | S83L/D87N | S80I      |               |  |  |  |  | R2 | R2 | R2 | R2 | ESBL      |
| 423 | 27 | 33 | 33 | 33 |           |           |               |  |  |  |  | WT | WT | WT | WT | WT        |
| 424 | 6  | 26 | 24 | 25 | S83L      |           |               |  |  |  |  | R1 | R1 | R1 | R1 | WT        |
| 425 | 6  | 6  | 6  | 13 | S83L/D87Y | S80I/E84V |               |  |  |  |  | R2 | R2 | R2 | R2 | WT        |

|     |    |    |    |    |           |           |               |  |  |  |  |    |    |    |    |      |
|-----|----|----|----|----|-----------|-----------|---------------|--|--|--|--|----|----|----|----|------|
| 426 | 6  | 6  | 6  | 9  | S83L/D87N | S80I      | AAC(6')-Ib-cr |  |  |  |  | R2 | R2 | R2 | R2 | ESBL |
| 427 | 6  | 6  | 6  | 9  | S83L/D87N | S80I      | AAC(6')-Ib-cr |  |  |  |  | R2 | R2 | R2 | R2 | ESBL |
| 428 | 26 | 36 | 33 | 34 |           |           |               |  |  |  |  | WT | WT | WT | WT | WT   |
| 429 | 14 | 23 | 22 | 23 |           |           | Qnr-S1        |  |  |  |  | R1 | R1 | R1 | R1 | WT   |
| 430 | 6  | 31 | 29 | 32 | S83L      |           |               |  |  |  |  | R1 | R1 | R1 | R1 | WT   |
| 431 | 25 | 31 | 30 | 31 |           |           |               |  |  |  |  | WT | WT | WT | WT | WT   |
| 432 | 6  | 6  | 6  | 9  | S83L/D87N | S80I/E84V |               |  |  |  |  | R2 | R2 | R2 | R2 | WT   |
| 433 | 6  | 6  | 6  | 9  | S83L/D87N | S80I/E84V |               |  |  |  |  | R2 | R2 | R2 | R2 | ESBL |
| 434 | 6  | 6  | 6  | 10 | S83L/D87N | S80I      |               |  |  |  |  | R2 | R2 | R2 | R2 | WT   |
| 435 | 6  | 6  | 6  | 11 | S83L/D87N | S80I/E84V |               |  |  |  |  | R2 | R2 | R2 | R2 | ESBL |
| 436 | 6  | 20 | 23 | 20 | S83L      |           |               |  |  |  |  | R1 | R1 | R1 | R1 | AmpC |
| 437 | 26 | 36 | 34 | 33 |           |           |               |  |  |  |  | WT | WT | WT | WT | WT   |
| 438 | 27 | 30 | 30 | 29 |           |           |               |  |  |  |  | WT | WT | WT | WT | AmpC |
| 439 | 6  | 6  | 6  | 6  | S83L/D87N | S80I/E84V |               |  |  |  |  | R2 | R2 | R2 | R2 | ESBL |
| 440 | 6  | 6  | 6  | 6  | S83L/D87N | S80I      | Aac(6')-Ib-cr |  |  |  |  | R2 | R2 | R2 | R2 | WT   |
| 441 | 6  | 23 | 22 | 23 | S83L      |           |               |  |  |  |  | R1 | R1 | R1 | R1 | WT   |
| 442 | 20 | 28 | 25 | 26 |           |           |               |  |  |  |  | WT | WT | WT | WT | WT   |
| 443 | 22 | 27 | 26 | 27 |           |           |               |  |  |  |  | WT | WT | WT | WT | WT   |
| 444 | 6  | 26 | 22 | 22 | S83L      |           |               |  |  |  |  | R1 | R1 | R1 | R1 | WT   |
| 445 | 25 | 31 | 29 | 33 |           |           |               |  |  |  |  | WT | WT | WT | WT | WT   |
| 446 | 29 | 33 | 32 | 33 |           |           |               |  |  |  |  | WT | WT | WT | WT | WT   |
| 447 | 6  | 27 | 26 | 26 | S83L      |           |               |  |  |  |  | R1 | R1 | R1 | R1 | WT   |
| 448 | 6  | 12 | 14 | 13 | S83L/D87Y | S80R      |               |  |  |  |  | R2 | R2 | R2 | R2 | WT   |
| 449 | 26 | 36 | 33 | 32 |           |           |               |  |  |  |  | WT | WT | WT | WT | WT   |
| 450 | 6  | 35 | 23 | 37 | S83L      |           |               |  |  |  |  | R1 | R1 | R1 | R1 | WT   |
| 451 | 6  | 22 | 26 | 22 | S83L      |           |               |  |  |  |  | R1 | R1 | R1 | R1 | WT   |
| 452 | 6  | 22 | 21 | 22 | S83L      |           |               |  |  |  |  | R1 | R1 | R1 | R1 | WT   |
| 453 | 6  | 22 | 25 | 21 | S83L      |           |               |  |  |  |  | R1 | R1 | R1 | R1 | WT   |
| 454 | 6  | 13 | 13 | 15 | S83L/D87N | S80I      |               |  |  |  |  | R2 | R2 | R2 | R2 | WT   |
| 455 | 6  | 13 | 10 | 16 | S83L/D87N | S80I      |               |  |  |  |  | R2 | R2 | R2 | R2 | ESBL |
| 456 | 29 | 34 | 31 | 31 |           |           |               |  |  |  |  | WT | WT | WT | WT | WT   |
| 457 | 6  | 24 | 22 | 24 | S83L      |           |               |  |  |  |  | R1 | R1 | R1 | R1 | WT   |
| 458 | 6  | 27 | 24 | 25 | S83L      |           |               |  |  |  |  | R1 | R1 | R1 | R1 | WT   |

|     |    |    |    |    |           |           |               |       |  |  |  |    |    |    |    |      |
|-----|----|----|----|----|-----------|-----------|---------------|-------|--|--|--|----|----|----|----|------|
| 459 | 6  | 6  | 6  | 9  | S83L/D87N | S80I      | AAC(6')-Ib-cr |       |  |  |  | R2 | R2 | R2 | R2 | WT   |
| 460 | 6  | 21 | 20 | 23 | S83L      | S80I      |               |       |  |  |  | R1 | R1 | R1 | R1 | ESBL |
| 461 | 6  | 19 | 20 | 22 | S83L      | S80I      |               |       |  |  |  | R1 | R1 | R1 | R1 | ESBL |
| 462 | 6  | 11 | 11 | 13 | S83L/D87N | S80I      |               |       |  |  |  | R2 | R2 | R2 | R2 | WT   |
| 463 | 6  | 6  | 6  | 10 | S83L/D87N | S80I      | AAC(6')-Ib-cr |       |  |  |  | R2 | R2 | R2 | R2 | WT   |
| 464 | 13 | 23 | 27 | 22 |           |           |               |       |  |  |  | R1 | R1 | R1 | WT | WT   |
| 465 | 6  | 29 | 27 | 26 | S83L      |           |               |       |  |  |  | R1 | R1 | R1 | R1 | WT   |
| 466 | 6  | 6  | 6  | 9  | S83L/D87Y | S80I/E84G | AAC(6')-Ib-cr |       |  |  |  | R2 | R2 | R2 | R2 | ESBL |
| 467 | 27 | 37 | 37 | 37 |           |           |               |       |  |  |  | WT | WT | WT | WT | WT   |
| 468 | 6  | 6  | 6  | 9  | S83L/D87Y | S80I/E84V |               |       |  |  |  | R2 | R2 | R2 | R2 | WT   |
| 469 | 6  | 6  | 6  | 10 | S83L/D87N | S80I/E84V |               |       |  |  |  | R2 | R2 | R2 | R2 | ESBL |
| 470 | 6  | 6  | 6  | 6  | S83L/D87N | S80I      |               |       |  |  |  | R2 | R2 | R2 | R2 | ESBL |
| 471 | 6  | 23 | 23 | 24 | S83L      |           |               |       |  |  |  | R1 | R1 | R1 | R1 | WT   |
| 472 | 7  | 36 | 6  | 35 | S83L/D87N | S80I      |               |       |  |  |  | R2 | R2 | R2 | R2 | ESBL |
| 473 | 7  | 36 | 6  | 35 | S83L/D87N | S80I      |               |       |  |  |  | R2 | R2 | R2 | R2 | ESBL |
| 474 | 6  | 6  | 6  | 15 | S83L/D87  | S80R      | AAC(6')-Ib-cr | E85fs |  |  |  | R2 | R2 | R2 | R2 | WT   |
| 475 | 28 | 34 | 32 | 32 |           |           |               |       |  |  |  | WT | WT | WT | WT | WT   |
| 476 | 6  | 6  | 6  | 6  | S83L/D87N | S80I      |               | D92fs |  |  |  | R2 | R2 | R2 | R2 | WT   |
| 477 | 24 | 27 | 24 | 27 |           |           |               |       |  |  |  | WT | WT | WT | WT | WT   |
| 478 | 6  | 29 | 25 | 28 | S83L      |           |               |       |  |  |  | R1 | R1 | R1 | R1 | WT   |
| 479 | 28 | 40 | 37 | 36 |           |           |               |       |  |  |  | WT | WT | WT | WT | ESBL |
| 480 | 24 | 29 | 30 | 31 |           |           |               |       |  |  |  | WT | WT | WT | WT | WT   |
| 481 | 6  | 27 | 26 | 26 | S83L      |           |               |       |  |  |  | R1 | R1 | R1 | R1 | WT   |
| 482 | 28 | 36 | 35 | 33 |           |           |               |       |  |  |  | WT | WT | WT | WT | WT   |
| 483 | 26 | 33 | 34 | 32 |           |           |               |       |  |  |  | WT | WT | WT | WT | WT   |
| 484 | 6  | 6  | 6  | 9  | S83L/D87N | S80I      |               |       |  |  |  | R2 | R2 | R2 | R2 | ESBL |
| 485 | 6  | 24 | 23 | 24 | S83L      |           |               |       |  |  |  | R1 | R1 | R1 | R1 | WT   |
| 486 | 6  | 6  | 6  | 12 | S83L/D87N | S80I      |               |       |  |  |  | R2 | R2 | R2 | R2 | WT   |
| 487 | 6  | 6  | 6  | 6  | S83L/D87N | S80I/E84V |               | G69fs |  |  |  | R2 | R2 | R2 | R2 | WT   |
| 488 | 6  | 27 | 26 | 26 | S83L      |           |               |       |  |  |  | R1 | R1 | R1 | R1 | WT   |
| 489 | 27 | 33 | 29 | 32 |           |           |               |       |  |  |  | WT | WT | WT | WT | WT   |
| 490 | 6  | 23 | 22 | 22 | S83L      |           |               |       |  |  |  | R1 | R1 | R1 | R1 | WT   |
| 491 | 25 | 41 | 37 | 38 |           |           |               |       |  |  |  | WT | WT | WT | WT | WT   |

|     |    |    |    |    |           |           |               |                   |  |  |  |    |    |    |    |       |
|-----|----|----|----|----|-----------|-----------|---------------|-------------------|--|--|--|----|----|----|----|-------|
| 492 | 6  | 18 | 18 | 17 | S83L      |           |               |                   |  |  |  | R1 | R1 | R2 | R1 | WT    |
| 493 | 6  | 21 | 20 | 18 | S83L      |           |               |                   |  |  |  | R1 | R1 | R1 | R1 | WT    |
| 494 | 6  | 21 | 19 | 20 | S83L      |           |               |                   |  |  |  | R1 | R1 | R1 | R1 | WT    |
| 495 | 6  | 22 | 19 | 21 | S83L      |           |               |                   |  |  |  | R1 | R1 | R1 | R1 | WT    |
| 496 | 6  | 30 | 31 | 26 | S83L      |           |               |                   |  |  |  | R1 | R1 | R1 | R1 | WT    |
| 497 | 9  | 30 | 28 | 30 | S83L      |           |               |                   |  |  |  | R1 | R1 | R1 | R1 | WT    |
| 498 | 25 | 34 | 33 | 32 |           |           |               |                   |  |  |  | WT | WT | WT | WT | WT    |
| 499 | 26 | 32 | 31 | 30 |           |           |               |                   |  |  |  | WT | WT | WT | WT | ESBL  |
| 500 | 6  | 6  | 6  | 11 | S83L/D87N | S80I/E84V | AAC(6')-Ib-cr |                   |  |  |  | R2 | R2 | R2 | R2 | ESBL  |
| 501 | 24 | 28 | 26 | 26 |           |           |               |                   |  |  |  | WT | WT | WT | WT | WT    |
| 502 | 6  | 6  | 6  | 6  | S83L/D87N | S80I      |               |                   |  |  |  | R2 | R2 | R2 | R2 | WT    |
| 503 | 6  | 6  | 6  | 6  | S83L/D87N | S80I      |               |                   |  |  |  | R2 | R2 | R2 | R2 | ESBL  |
| 504 | 6  | 6  | 6  | 12 | S83L/D87N | S80I/E84V | AAC(6')-Ib-cr |                   |  |  |  | R2 | R2 | R2 | R2 | ESBL  |
| 505 | 6  | 22 | 24 | 22 | S83L      |           |               |                   |  |  |  | R1 | R1 | R1 | R1 | ESBL  |
| 506 | 6  | 20 | 22 | 18 | S83L      |           | Qnr-B4        |                   |  |  |  | R1 | R1 | R1 | R1 | WT    |
| 507 | 26 | 29 | 28 | 30 |           |           |               |                   |  |  |  | WT | WT | WT | WT | WT    |
| 508 | 11 | 30 | 27 | 29 | D87Y      |           |               |                   |  |  |  | R1 | R1 | R1 | R1 | WT    |
| 509 | 6  | 23 | 26 | 22 | S83L      |           |               |                   |  |  |  | R1 | R1 | R1 | R1 | WT    |
| 510 | 6  | 19 | 23 | 19 | S83L      |           |               |                   |  |  |  | R1 | R1 | R1 | R1 | WT    |
| 511 | 6  | 21 | 25 | 20 | S83L      |           |               |                   |  |  |  | R1 | R1 | R1 | R1 | WT    |
| 512 | 6  | 21 | 24 | 21 | S83L      |           |               |                   |  |  |  | R1 | R1 | R1 | R1 | WT    |
| 513 | 13 | 23 | 24 | 23 |           |           | Qnr-S2        |                   |  |  |  | R1 | R1 | R1 | R1 | WT    |
| 514 | 10 | 23 | 20 | 23 | S83L      |           |               |                   |  |  |  | R1 | R1 | R1 | R1 | WT    |
| 515 | 6  | 24 | 19 | 24 | S83L      |           |               |                   |  |  |  | R1 | R1 | R1 | R1 | ESBL  |
| 516 | 15 | 22 | 23 | 25 |           |           |               |                   |  |  |  | R1 | R1 | R1 | WT | WT    |
| 517 | 6  | 27 | 28 | 27 | S83L      |           |               |                   |  |  |  | R1 | R1 | R1 | R1 | ESBL  |
| 518 | 6  | 24 | 24 | 26 | S83L      |           |               |                   |  |  |  | R1 | R1 | R1 | R1 | AmpC  |
| 519 | 6  | 6  | 6  | 6  | S83L/D87N | S80I      |               | Y137H, G103S      |  |  |  | R2 | R2 | R2 | R2 | Carba |
| 520 | 7  | 32 | 28 | 30 | S83L      |           |               | G103S, Y137H      |  |  |  | R1 | R1 | R1 | R1 | Carba |
| 521 | 26 | 33 | 32 | 31 |           |           |               | Y137H, S3N, G103S |  |  |  | WT | WT | WT | WT | Carba |
| 522 | 20 | 29 | 27 | 27 |           |           |               | Y137H, G103S      |  |  |  | WT | WT | WT | WT | Carba |
| 523 | 6  | 23 | 22 | 24 | S83L      |           |               |                   |  |  |  | R1 | R1 | R1 | R1 | WT    |
| 524 | 6  | 6  | 6  | 6  | S83L/D87N | S80I      | Oqx-B         | Y137H, G103S      |  |  |  | R2 | R2 | R2 | R2 | Carba |

|     |    |    |    |    |           |           |        |              |  |  |    |    |    |    |       |
|-----|----|----|----|----|-----------|-----------|--------|--------------|--|--|----|----|----|----|-------|
| 525 | 6  | 6  | 6  | 6  | S83L/D87N | S80I      |        | G103S, Y137H |  |  | R2 | R2 | R2 | R2 | Carba |
| 526 | 14 | 21 | 22 | 21 |           |           | Qnr-S1 |              |  |  | R1 | R1 | R1 | R1 | ESBL  |
| 527 | 6  | 26 | 27 | 23 | S83L      |           |        |              |  |  | R1 | R1 | R1 | R1 | ESBL  |
| 528 | 15 | 22 | 23 | 22 | S83L      |           |        |              |  |  | R1 | R1 | R1 | R1 | WT    |
| 529 | 6  | 22 | 25 | 22 | S83L      |           |        |              |  |  | R1 | R1 | R1 | R1 | ESBL  |
| 530 | 10 | 25 | 23 | 26 | S83L      |           | Qnr-S1 |              |  |  | R1 | R1 | R1 | R1 | ESBL  |
| 531 | 6  | 6  | 6  | 7  | S83L/D87N | S80I      | QepA4  |              |  |  | R2 | R2 | R2 | R2 | Carba |
| 532 | 6  | 27 | 20 | 27 | S83L      |           |        |              |  |  | R1 | R1 | R1 | R1 | WT    |
| 533 | 6  | 6  | 6  | 8  | S83L/D87N | S80I      |        | G103S, Y137H |  |  | R2 | R2 | R2 | R2 | Carba |
| 534 | 6  | 27 | 27 | 26 | S83L      |           |        |              |  |  | R1 | R1 | R1 | R1 | ESBL  |
| 535 | 14 | 26 | 23 | 25 |           |           | QnrS1  | S3N, Y137H   |  |  | R1 | R1 | R1 | R1 | Carba |
| 536 | 21 | 36 | 33 | 35 |           |           | Oqx B  | Y137H, G103S |  |  | WT | WT | WT | R1 | Carba |
| 537 | 6  | 6  | 6  | 12 | S83L/D87N | S80I/E84G |        | G103S, Y137H |  |  | R2 | R2 | R2 | R2 | Carba |
| 538 | 6  | 6  | 6  | 6  | S83L/D87N | S80I      |        | G103S, Y137H |  |  | R2 | R2 | R2 | R2 | Carba |
| 539 | 6  | 25 | 24 | 24 | S83L      |           |        | Y137H, G103S |  |  | R1 | R1 | R1 | R1 | Carba |
| 540 | 6  | 22 | 23 | 22 | S83L      |           |        |              |  |  | R1 | R1 | R1 | R1 | WT    |
| 541 | 6  | 21 | 22 | 22 | S83L      | E84G      |        |              |  |  | R1 | R1 | R1 | R1 | ESBL  |
| 542 | 6  | 27 | 23 | 29 | S83L      |           |        | G103S, Y137H |  |  | R1 | R1 | R1 | R1 | Carba |
| 543 | 6  | 6  | 6  | 6  | S83L/D87N | S80I      |        | Y137H, G103S |  |  | R2 | R2 | R2 | R2 | Carba |
| 544 | 6  | 6  | 6  | 10 | S83L/D87N | S80I      |        | G103S, Y137H |  |  | R2 | R2 | R2 | R2 | Carba |
| 545 | 6  | 6  | 6  | 11 | S83L/D87N | S80I      | Qnr-S1 |              |  |  | R2 | R2 | R2 | R2 | Carba |
| 546 | 6  | 6  | 6  | 11 | S83L/D87N | S80I      | Qnr-S1 | Y137H, G103S |  |  | R2 | R2 | R2 | R2 | Carba |
| 547 | 6  | 28 | 26 | 25 | S83L      |           |        | Y137H, G103S |  |  | R1 | R1 | R1 | R1 | Carba |
| 548 | 6  | 6  | 6  | 8  | S83L/D87N | S80I/E84G | QnrD2  | G103S, Y137H |  |  | R2 | R2 | R2 | R2 | Carba |
| 549 | 6  | 11 | 9  | 13 | S83L/D87N | S80I      |        | Y137H, G103S |  |  | R2 | R2 | R2 | R2 | Carba |
| 550 | 6  | 27 | 28 | 26 | S83L      |           |        | Y137H, G103S |  |  | R1 | R1 | R1 | R1 | Carba |
| 551 | 26 | 32 | 30 | 35 |           |           |        | Y137H, G103S |  |  | WT | WT | WT | WT | Carba |
| 552 | 6  | 6  | 6  | 11 | S83L/D87N | S80I      |        | Y137H, G103S |  |  | R2 | R2 | R2 | R2 | Carba |
| 553 | 6  | 6  | 6  | 13 | S83L/D87N | S80I      |        | Y137H, G103S |  |  | R2 | R2 | R2 | R2 | Carba |

ST, Sequence type; NAL, Nalidixic acid (30 µg); NOR, Norfloxacin (10 µg); CIP, Ciprofloxacin (5 µg); LEV, Levofloxacin (5 µg); R1, low-level-resistance; R2, high-level-resistance; WT, no ESBL/AmpC/carbapenemase producer.
